## Ubiquitin-protein ligase *Ubr5* cooperates with Hedgehog signalling to promote skeletal tissue homeostasis.

David Mellis<sup>1¶</sup>, Katherine A Staines<sup>2¶</sup>, Silvia Peluso<sup>3</sup>, Ioanna Ch. Georgiou<sup>4</sup>, Natalie Dora<sup>3</sup>, Malgorzata Kubiak<sup>1</sup>, Michela Grillo<sup>1</sup>, Colin Farquharson<sup>5</sup>, Elaine Kinsella<sup>1</sup>, Anna Thornburn<sup>3</sup>, Stuart H Ralston<sup>6</sup>, Donald M Salter<sup>6</sup>, Natalia A Riobo-Del Galdo<sup>4&</sup>, Robert E Hill<sup>3&\*</sup> and Mark Ditzel<sup>1&</sup>.

<sup>1</sup> Edinburgh CRUK Cancer Research Centre, MRC Institute for Genetics and Molecular Medicine, University of Edinburgh, Edinburgh, UK.

<sup>2</sup> School of Pharmacy and Biomolecular Sciences, University of Brighton, Brighton, UK.

<sup>3</sup> MRC Human Genetics Unit, MRC Institute for Genetics and Molecular Medicine, University of Edinburgh, Edinburgh, UK

<sup>4</sup> Leeds Institute of Medical Research and School of Molecular and Cellular Biology, University of Leeds, Leeds, UK.

<sup>5</sup> Roslin Institute and R(D)SVS, The University of Edinburgh, Edinburgh, UK

<sup>6</sup> Centre for Genomic and Experimental Medicine, MRC Institute for Genetics and Molecular Medicine, University of Edinburgh, Edinburgh, UK.

\* Corresponding author

Email [bob.hill@igmm.ed.ac.uk](mailto:bob.hill@igmm.ed.ac.uk) (REH)

¶ These authors contributed equally to this work.

& These authors also contributed equally to this work

**Short title:** *Ubr5* and skeletal tissue homeostasis

**Keywords:** *UBR5*; ubiquitin ligase; articular cartilage; ossification; Hedgehog signaling

## 1 **Abstract**

2 Mammalian Hedgehog (HH) signalling pathway plays an essential role in tissue  
3 homeostasis and its deregulation is linked to rheumatological disorders. UBR5 is the mammalian  
4 homologue of the E3 ubiquitin-protein ligase Hyd, a negative regulator of the Hh-pathway in  
5 *Drosophila*. To investigate a possible role of UBR5 in regulation of the musculoskeletal system  
6 through modulation of mammalian HH signaling, we created a mouse model for specific loss of  
7 *Ubr5* function in limb bud mesenchyme. Our findings revealed a role for UBR5 in maintaining  
8 cartilage homeostasis and suppressing metaplasia. *Ubr5* loss of function resulted in progressive  
9 and dramatic articular cartilage degradation, enlarged, abnormally shaped sesamoid bones and  
10 extensive heterotopic tissue metaplasia linked to calcification of tendons and ossification of  
11 synovium. Genetic suppression of smoothened (*Smo*), a key mediator of HH signalling,  
12 dramatically enhanced the *Ubr5* mutant phenotype. Analysis of HH signalling in both mouse and  
13 cell model systems revealed that loss of *Ubr5* stimulated canonical HH-signalling while also  
14 increasing PKA activity. In addition, human osteoarthritic samples revealed similar correlations  
15 between *UBR5* expression, canonical HH signalling and PKA activity markers. Our studies  
16 identified a crucial function for the *Ubr5* gene in the maintenance of skeletal tissue homeostasis  
17 and an unexpected mode of regulation of the HH signalling pathway.

18

## 19 **Author Summary**

20 Ubiquitin ligases modify proteins post-translationally which is essential for a variety of  
21 cellular processes. UBR5 is an E3 ubiquitin ligase and in *Drosophila* is a regulator of Hedgehog  
22 signaling. In mammals, the Hedgehog (HH) signalling pathway, among many other roles, plays  
23 an essential role in tissue maintenance, a process called homeostasis. A murine genetic system  
24 was developed to specifically eliminate UBR5 function from embryonic limb tissue that  
25 subsequently forms bone and connective tissue (ligaments and tendons). This approach revealed  
26 that UBR5 operates as a potent suppressor of excessive growth of normal cartilage and bone and  
27 prevents formation of bone in ectopic sites in connective tissue near the knees and ankle joints.  
28 In contrast to abnormal growth, UBR5 inhibits degradation of the articular cartilage that cushions  
29 the knee joint leading to extensive exposure of underlying bone. Furthermore, Ubr5 interacts with  
30 smoothed, a component of the HH pathway, identifying UBR5 as a regulator of mammalian HH  
31 signaling in the postnatal musculoskeletal system. In summary, this work shows that UBR5  
32 interacts with the HH pathway to regulate skeletal homeostasis in and around joints of the legs  
33 and identifies targets that may be harnessed for biomedical engineering and clinical applications.

34

## 35 Introduction

36 Ubiquitin ligases target proteins for ubiquitination which can modulate protein function by  
37 regulating protein degradation, protein–protein interactions, and protein localization [1-4], and  
38 thus, provide important post-translational mechanisms essential for a variety of cellular  
39 processes. The *Drosophila* homologue of the mammalian *Ubiquitin Protein Ligase E3 Component*  
40 *N-Recognin 5* (UBR5), designated as *hyperplastic discs* (Hyd), was originally identified as a  
41 *Drosophila* tumor suppressor protein [5-7] and regulator of Hedgehog (HH) signalling [6]. Physical  
42 and genetic interactions with established components of the HH signalling pathway [7, 8]  
43 strengthened Hyd's role as a regulator of HH signalling. We previously addressed a possible  
44 conserved role for UBR5 in HH-mediated processes in mice [9]. Although no overt effects were  
45 seen in patterning of the developing limb bud in mouse embryogenesis; here, we show that the  
46 coordinated action of Ubr5 with HH signalling is crucial to maintain skeletal tissue homeostasis  
47 associated with the appendicular skeleton postnatally and in adult mice.

48 HH signalling regulates cell processes that are critical for skeletal tissue development,  
49 growth and homeostasis [10]. Two HH ligands, Sonic- and Indian-Hedgehog (SHH and IHH,  
50 respectively) are widely expressed and function as extracellular signalling molecules that bind to  
51 cells expressing HH receptors such as patched-1 (PTCH1). Binding to PTCH1 results in de-  
52 repression of the G protein-coupled receptor, smoothened (SMO), and activation of SMO-  
53 associated canonical and non-canonical signalling pathways [11-13]. Activation of the SMO-  
54 associated canonical pathway results in stimulation of GLI-mediated transcription and expression  
55 of crucial target genes [7]. Activation of the recently identified SMO-associated non-canonical  
56 pathway relies on SMO's GPCR activity [14, 15] and results in inhibitory heterotrimeric G protein-  
57 mediated inhibition of adenylate cyclase and a concomitant reduction in cyclic AMP (cAMP) levels  
58 [14, 16, 17]. Although not yet experimentally addressed, non-canonical signalling may also

59 contribute to many of the well-described roles for canonical HH signalling in normal skeletal  
60 formation, maturation and maintenance [10, 18].

61 At birth, IHH is the ligand that drives HH signalling within the growing limbs. Expression of  
62 *Ihh* is localized to a zone of postmitotic, prehypertrophic chondrocytes immediately adjacent to  
63 the zone of proliferating chondrocytes [18-20] and is essential for endochondral ossification but  
64 also induces osteoblast differentiation in the perichondrium [21]. Dysregulation of this signalling  
65 pathway is detrimental to musculoskeletal tissue homeostasis [22, 23]. Notably, studies have  
66 shown that increased HH signalling can drive pathological ectopic cartilage and bone formation  
67 in soft tissues [10] through the process of heterotopic chondrogenesis and heterotopic ossification  
68 (HO) [24]. Upregulation of HH signalling is believed to contribute to the rare disorder, progressive  
69 osseous heteroplasia (POH), which includes in its phenotypic spectrum soft tissue ossification.  
70 POH is caused by loss-of-function of *GNAS*, a G protein alpha subunit and activator of adenylate  
71 cyclase. A murine model of POH demonstrated that increased HH signalling as a consequence  
72 of *GNAS* loss-of-function in mesenchymal limb progenitor cells drove heterotopic ossification [25].  
73 Similarly, synovial chondromatosis, a disease resulting in ossification of synovial tissue is  
74 associated with increased canonical HH signalling [26]. However, in contrast with cartilage and  
75 bone gain, elevated HH signalling is also associated with the cartilage degradation and loss [27,  
76 28]. Hence, appropriate HH signalling is normally involved in the suppression of ectopic, and  
77 genesis and maintenance of normtopic, cartilage and bone.

78 Here, we show that the loss of *Ubr5* function in *Ubr5<sup>mt</sup>* mice resulted in diverse  
79 musculoskeletal defects including spontaneous, progressive and tissue-specific patterns of  
80 ectopic chondrogenesis and ossification as well as articular cartilage degeneration and shedding.  
81 Surprisingly, reducing SMO function in UBR5-deficient mice led to a dramatic reduction in the age  
82 of onset and increased severity of the *Ubr5<sup>mt</sup>* phenotype. These observations challenge the  
83 existing dogma by highlighting an important role for *Smo*, in the absence of UBR5, in suppressing,  
84 rather than promoting, ectopic chondrogenesis, tissue calcification/ossification and articular

85 cartilage damage. We, therefore, reveal a previously unknown physiological role for *Ubr5* and  
86 highlight its genetic interaction with *Smo* in regulating cellular and tissue-homeostasis. These  
87 findings may influence current therapeutic approaches modulating HH signalling for the treatment  
88 of osteoarthritis and heterotopic ossification.

89

## 90 **Results**

### 91 **Loss of *Ubr5* function causes skeletal heterotopias at 6 months**

92 To overcome the embryonic lethality associated with germline mutant animals [29], we  
93 combined a *Ubr5* conditional loss-of-function gene trap (*Ubr5<sup>gt</sup>*) [9] with *Prx1-Cre* [30] (*Prx1-*  
94 *Cre;Ubr5<sup>gt/gt</sup>* animals henceforth, referred to as *Ubr5<sup>mt</sup>*) to ensure that adult tissues derived from  
95 early limb bud mesenchyme, predominantly bone and connective tissue, were *Ubr5* deficient.  
96 Since the HH pathway affects embryonic limb patterning and bone growth, the *Ubr5* deficient  
97 fetuses (at E15.5) were initially examined and bones and joints appeared to develop normally  
98 [9]. However, the HH pathway continues to function in postnatal bone growth and homeostasis  
99 [10] and thus, at approximately 6 months of age, we noticed that mice began to display defects  
100 in locomotion. Control animals normally remained supported by their hindlimbs ('sprung'),  
101 whereas, *Ubr5<sup>mt</sup>* animals rested their posteriors directly upon the floor ('squat') (S1 Fig A-C).  
102 Considering the tissue targeted by the conditional mutation, the observed phenotype indicated a  
103 potential musculoskeletal system defect which prompted the examination of hindleg bone and  
104 joint structures.

105 At 6 months of age, X-ray imaging revealed that *Ubr5<sup>mt</sup>* animals exhibited abnormally  
106 shaped and/or ectopic signals around knee and ankle joints (S1 Fig D-I). 3D micro-computed  
107 tomography ( $\mu$ CT) revealed that, whereas *Prx1-Cre* control joints appeared normal with no  
108 evidence of ectopic structures (Fig 1A), the knees and ankles of all *Ubr5<sup>mt</sup>* mice (n=10) exhibited  
109 isolated ectopic signals clearly separated from the adjacent femoral condyles and tibia (Fig 1B).

110 Surface rendering of the  $\mu$ CT scans demonstrated that the array of knee-associated sesamoid  
111 bones (patella and fabella) and calcified menisci (Fig 1 C,D) were abnormal. *Ubr5<sup>mt</sup>* knees  
112 presented with large ectopic structures on all four faces of the knee joint, as well as enlarged and  
113 irregularly shaped fabella and patella sesamoid bones (Fig 1D). In addition, the *Ubr5<sup>mt</sup>* animals  
114 exhibited multiple ectopic signals around the ankle joint (Fig 1 E-G), with the most striking one  
115 appearing consistently on the dorsal side running parallel to the long axis of the tibia (Fig 1 F,  
116 open arrows) associated with the Achilles tendon (AT). This ectopic signal remained isolated from  
117 the calcaneus and tibia. Other ectopic structures included two ectopic U-shaped signals on the  
118 ventral and lateral sides of the tibia (Fig 1 G).

119 Following recombination of the *Ubr5<sup>gt</sup>* gene-trap construct, *lacZ* is expressed under the  
120 influence of *Ubr5* gene regulators enabling the analysis of the postnatal tissues expressing *Ubr5*  
121 Previously [9], we showed that  $\beta$ -gal activity was restricted to the limb mesenchyme at  
122 embryonic stages . Analysis of *lacZ* expression in 20 week-old mice control and *Ubr5<sup>mt</sup>* knee  
123 (Fig 1 H, I) and ankle (Fig 1 J, K) joints revealed strong  $\beta$ -gal activity in tissue derived from this  
124 embryonic mesenchyme. Expression occurred around the periphery of the menisci and  
125 synovium (Fig 1 L, M). The ankle also revealed  $\beta$ -gal activity within the AT and superficial digital  
126 flexor tendon and in a large ectopic structure within the AT midbody (Fig 1 N, O). In addition,  
127 expression was detected within the upper layer chondrocytes of the femoral and tibial articular  
128 cartilage (AC) (Fig P, Q). Thus, the tissues that exhibit Cre-mediated expression of the *lacZ*  
129 gene are affected in the mutant phenotype.

130

### 131 ***Ubr5<sup>mt</sup>*-associated ectopic structures exhibit chondrogenesis and calcification**

132 The morphology of these ectopic structures was further investigated to determine the  
133 cellular composition and possible derivation of these ectopias. As shown by  $\mu$ CT, both knee (Fig.  
134 2 A, B) and ankle (Fig. 2 C, D) ectopic structures harbored different X-ray densities and internal

135 structures indicative of bone. This was confirmed in the ankle joint by von Kossa staining, in which  
136 large ectopic staining was observed in the AT (Fig. 2E, F) and in the superficial digital flexor  
137 tendon (Fig. 2E, white arrowhead). Subsequent histological analysis of the AT revealed, in *Prx1-*  
138 *Cre* controls, the expected ordered stacking of tenocytes along the anterior-posterior axis of the  
139 tendon (Fig. 2G) and an absence of toluidine blue staining associated with proteoglycans (Fig.  
140 2H). In contrast, regions of the *Ubr5<sup>mt</sup>* Achilles tendon were devoid of tenocytes, which were  
141 replaced by long columns of proteoglycan-expressing hypertrophic chondrocytes (Fig. 2I, J). The  
142 combination of the distinctive cell morphology and toluidine blue-staining pattern suggested that  
143 ectopic chondrocytes and their associated extracellular matrix were present in *Ubr5<sup>mt</sup>* tendons.

144 To address the presence of ectopic calcium deposition, we used Von Kossa staining of  
145 *Ubr5<sup>mt</sup>* knee joints that revealed positive stained structures within the synovium deep to the  
146 patellar tendon (Fig. 2K, L). Histological analysis of *Prx1-Cre* control knee joints revealed a  
147 synoviocyte-rich intimal layer of the synovium (Fig. 2M, N), whereas *Ubr5<sup>mt</sup>* knee joints exhibited  
148 bone- (Fig. 2O) and cartilage-like (Fig. 2P) ectopic structures. Thus, we observed a phenotype  
149 consisting of ectopic chondrogenesis, calcification and ossification (hereafter, referred as ECCO)  
150 of the synovium and tendons in *Ubr5<sup>mt</sup>* tissues. We concluded that *Ubr5* normally prevents  
151 spontaneous ectopic formation of chondrocytes in tissues and calcification and/or ossification in  
152 cartilage.

153

## 154 **Loss of *Ubr5* function causes articular cartilage degradation**

155  $\mu$ CT analysis of 6-month old control (Fig. 3A-C) and *Ubr5<sup>mt</sup>* (Fig. 3D-F) knee joints  
156 revealed significantly increased volume of high subchondral bone density in the mutant (quantified  
157 in Fig 3G). Histological assessment showed a dramatic loss of articular cartilage (AC) from the  
158 lateral tibial and femoral surfaces of all *Ubr5<sup>mt</sup>* knee joints assessed (Fig 3H, I, K); a condition not  
159 detected in any control mice at this stage. Further examination of the exposed subchondral bone



160 in these *Ubr5<sup>mt</sup>* mice revealed abnormal intermixed bone and cartilage within this region (Fig 3J).  
161 Hence, the hindlegs at 24 weeks present a diverse range of cartilaginous defects including  
162 metaplastic conversion of connective tissue associated with the knee and ankle (as described  
163 above) whereas, the AC undergoes severe degradation causing exposure of the subchondral  
164 bone at the joint surface.

165

### 166 **Ubr5 deficiency results in a postnatal, progressive phenotype**

167 To establish the approximate age at which this striking ECCO phenotype is initially  
168 detectable, a timed series of *in vivo*  $\mu$ CT scans on ageing, live animals was followed. *Ubr5<sup>mt</sup>*  
169 animals at 3-weeks of age revealed no marked difference in knee or ankle joints (S2 Fig A-D),  
170 suggesting that the ectopic structures did not form during fetal development but rather formed  
171 postnatally. Between 6 and 12 weeks of age, the ectopic structures began to emerge (Fig 4A, B),  
172 initially on the ventral side of the tibia. Dorsally located ectopic signals associated with the Achilles'  
173 tendon emerged by 16 weeks of age (Fig 4C) and all ectopic structures were enlarged by 24  
174 weeks of age (Fig 4D). These data suggest that *Ubr5* deficiency led to enhanced, progressive  
175 chondrogenesis and osteogenesis in the connective tissue.

176 These metaplastic conversions within the connective tissue supporting the knee and  
177 ankle, however, contrast with the changes demonstrated in the AC which manifests as a  
178 degenerative phenotype. To investigate the timing of AC degradation, we examined mice at 3 and  
179 6 weeks. No gross structural disruption of the AC in the *Ubr5<sup>mt</sup>* animals at 3-weeks of age was  
180 detected (Fig 4E, F). By 6-weeks of age, *Ubr5<sup>mt</sup>* articular cartilage exhibited an irregular  
181 osteochondral interface (Fig 4G, I), clusters of large, hypertrophic-like chondrocytes (Fig 4 H, J)  
182 and a reduction in the number of superficial chondrocytes (Fig 4K). *Ubr5<sup>mt</sup>* articular cartilage also  
183 exhibited multiple tidemarks and regions of strongly eosin positive nuclei indicative of necrosis  
184 (Fig 4L, M) that were absent in controls. The loss of *Ubr5* function, therefore, resulted in early

185 cellular and extracellular AC abnormalities prior to the progressive AC degradation, increased  
186 subchondral bone density and exposure of subchondral bone detected in 6-month old animals.

187 Despite loss of UBR5 in early limb mesenchyme, these data indicated that the ectopic  
188 structures arose postnatally and subsequently progressed with age. To directly address if  
189 postnatal UBR5 function was required to suppress ECCO and the degradation of the AC, we  
190 utilised a mouse line carrying a tamoxifen-inducible, conditional Cre, *pCAGG-CreERT2* [30].  
191 Control *pCAGG-CreERT2* (*pCAGG-Con*) or *pCAGG-CreERT2;Ubr5<sup>gt/gt</sup>* (*pCAGG-Ubr5<sup>mt</sup>*) animals  
192 were treated with tamoxifen (administered on two consecutive days) at six weeks of age. Staining  
193 for  $\beta$ -gal activity, although more broadly distributed, confirmed tamoxifen-mediated recombination  
194 of the *Ubr5<sup>mt</sup>* gene trap and its associated  $\beta$ -gal expression in tissues that included muscles and  
195 tendons (S2 Fig E, F), and within the midbody ectopia at the AT(S2 Fig G).  $\mu$ CT analysis at 8  
196 weeks revealed that tamoxifen-treated control animals exhibited no ectopic signals (Fig 4N),  
197 whereas *pCAGG-Ubr5<sup>mt</sup>* animals exhibited Achilles' tendon -associated ectopic signals (Fig 4O).  
198 Scoring (Fig 4P) and heterotopic ossification (HO) volumetric analysis (Fig. 4Q) confirmed that  
199 only tamoxifen-treated *pCAGG-Ubr5<sup>mt</sup>* animals exhibited ectopic signals. Comparison of 12 week  
200 control to treated *pCAGG-Ubr5<sup>mt</sup>* (Fig 4 R, S) knees revealed *Ubr5<sup>mt</sup>*-associated apical acellular  
201 layer (Fig 4S, T), damage to the apical surface, multiple tidemarks, reduced superficial zone  
202 chondrocytes (Fig 4V) and increased numbers of empty lacunae (Fig. 4U, W). We concluded that  
203 postnatal *Ubr5* function was both necessary and sufficient to maintain AC homeostasis and  
204 prevent ECCO.

205

## 206 **Inhibition of *Smo* promotes *Ubr5<sup>mt</sup>*-associated ECCO and enhances *Ubr5<sup>mt</sup>*-** 207 **mediated AC degradation**

208 As UBR5/HYD regulates HH signalling in *Drosophila* [7, 8], we next used a genetic  
209 approach to address whether aberrant HH signaling contributed to the *Ubr5<sup>mt</sup>* ECCO and AC

210 phenotypes. The *Smo* gene encodes a core membrane component, regulated by the HH receptor  
211 PTCH1, that initiates the downstream signalling cascade leading to GLI-dependent transcription  
212 (canonical signalling) or G<sub>i</sub> protein-dependent events that are tissue specific (non-canonical  
213 signalling). We reasoned that reduction in *Smo* expression levels would sensitize the HH pathway;  
214 thus, heterozygosity for a *Smo* loss of function allele (*Smo*<sup>LoF</sup>) [31] was used in a cross to *Ubr5*<sup>mt</sup>  
215 to create *Prx1-Cre;Ubr5*<sup>gt/gt</sup>;*Smo*<sup>LoF/+</sup> animals (*Ubr5*<sup>mt</sup>+*Smo*<sup>LoF</sup>).

216 In contrast to our expectations,  $\mu$ CT analysis of 12-week *Ubr5*<sup>mt</sup>+*Smo*<sup>LoF</sup> mice exhibited  
217 significantly more severe defects than those of age-matched *Ubr5*<sup>mt</sup> (Fig 5 A-C) and *Smo*<sup>LoF/+</sup> mice  
218 (which were indistinguishable from wildtype), with multiple, large ectopic signals apparent around  
219 the knee (Fig 5 A-F) and ankle joints (Fig 5 H-M). Volumetric analysis revealed a significant  
220 increase in the volume of *Ubr5*<sup>mt</sup>+*Smo*<sup>LoF</sup> femoral-associated ectopic bodies compared to *Ubr5*<sup>mt</sup>  
221 alone (Fig. 5G) and the ankles harboured a 20-fold increase in the volume of ectopic signals (Fig  
222 5O). In agreement, histological analysis of the *Ubr5*<sup>mt</sup>+*Smo*<sup>LoF</sup> joints revealed an enhanced  
223 phenotype to that described in *Ubr5*<sup>mt</sup> (Figs. 2 & 3). *Ubr5*<sup>mt</sup>+*Smo*<sup>LoF</sup> synovium harboured large  
224 ectopic tissue masses (Fig 6A) with extensive vascularisation (Fig 6B) and chondrocytes lining  
225 the surface (Fig 6C) with deeper calcified cartilage and vascularization (Fig 6D). Sagittal  
226 sectioning through the ankle revealed large ectopic structures within the superficial digital flexor  
227 tendon (Fig 6E), consisting of bone and cartilaginous tissue (Fig 6F, H), and at the tendon  
228 interface (Fig 6G). Large swathes of chondrocytes were present within the superficial digital flexor  
229 and AT that coincided with an absence of tenocytes (Fig 6I, J), as previously reported in the *Ubr5*<sup>mt</sup>  
230 (Fig. 2). In addition, the AC in *Ubr5*<sup>mt</sup>+*Smo*<sup>LoF</sup> knee joints exhibited extensive loss over both tibial  
231 and femoral surfaces at this young age (Fig. 6M, N), while *Ubr5*<sup>mt</sup> knee joints exhibited only tears  
232 within the AC (Fig 6 K, L, quantification in O). Importantly, the loss of a single copy of *Smo* alone  
233 (*Prx1-Cre;Smo*<sup>LoF/+</sup>) resulted in no structural or AC damage (Fig 6P).

234

235

## 236 ***Ubr5* suppresses canonical HH signalling and PKA activity**

237 A functional link between UBR5 activity and HH signalling was further examined in 6-week  
238 old *Ubr5<sup>mt</sup>* mice. At this age ectopic structures were not detectable (Fig. 4), thereby increasing the  
239 likelihood of detecting potential causative changes in expression patterns. Immunohistochemistry  
240 on *Ubr5<sup>mt</sup>* knee intimal (Fig 7 A-F) and subintimal synovium (Fig 7 G - L) revealed increased *Gli1*  
241 expression in comparison to *Prx1-Cre* control animals (Fig 7 B, E and H, K; respectively),  
242 indicative of increased canonical HH signalling. qRT-PCR analysis also confirmed increased  
243 expression of markers of canonical HH signalling in RNA from isolated synovium (*Gli1* and *Ptc1*)  
244 (Fig. 7M). Additionally, intimal and sub-intimal *Ubr5<sup>mt</sup>* synovium exhibited increased  
245 phosphorylated PKA substrate (PPS) staining suggesting decreased G<sub>i</sub> proteins activation,  
246 characteristic of non-canonical HH signalling (Fig. 7 C, F, and I, L). Consistent with the  
247 observations in the synovium, *Ubr5<sup>mt</sup>* AC exhibited markers of increased canonical (Fig 8 A-D)  
248 and decreased non-canonical HH signalling (Fig 8 E, F). Although little change for PTCH1 was  
249 detected (Fig 8G) there was significant differences for Gli1 expression and PKA substrate staining  
250 (Fig 8 G-I).

251

## 252 **UBR5<sup>mt</sup> AC and damaged human AC exhibits both aberrant expression of markers of** 253 **chondrogenesis and HH signalling**

254 As seen in murine *Ubr5<sup>mt</sup>* AC, osteoarthritic AC from patients also exhibits markers of  
255 increased canonical HH signalling [32]. We next addressed (i) UBR5 expression and (ii) markers  
256 of decreased non-canonical HH signalling (PPS) in human AC. Graded samples from (OA)  
257 patients (S4 Fig A-C) undergoing total joint replacement were assessed for UBR5 expression (S4  
258 Fig E, G, I) and PKA activity (PPS in S4 Fig D, F, H). As in the murine model, PPS IHC staining  
259 increased (S4 Fig J), and hUBR5 staining decreased (S4 Fig K) with decreasing AC health.

260 Observations of changes in markers consistent with increased canonical and decreased non-  
261 canonical HH signalling in *Ubr5<sup>mt</sup>* synovium and AC were echoed in human OA samples.

262 To further delineate whether mammalian *Ubr5* could influence markers of canonical and  
263 non-canonical HH signalling, murine NIH3T3 cells were engineered to either exhibit increased  
264 (cDNA overexpression) or decreased (shRNA knock-down) *Ubr5* expression. Cells were then  
265 transfected with constructs encoding (i) *Shh*, (ii) constitutively active *Smo* mutant (*Smo-M2*) [35]  
266 or (iii) *Gli1*. Canonical pathway activity was measured using a *Gli*-responsive luciferase reporter  
267 assay. While perturbation of *Ubr5* expression had no effect on Shh- or Smo-M2-mediated  
268 signalling (Fig. 9A and 9B), *Ubr5* overexpression caused a significant reduction (Fig. 9A,  
269  $P < 0.001$ ), and *Ubr5* shRNA-mediated knockdown caused a significant increase (Fig. 9B,  $P < 0.05$ ),  
270 in Gli1-mediated luciferase activity. However, *Ubr5*-overexpression did not perturb the expression  
271 level of endogenous or exogenous GLI1 protein (Fig. 9C), excluding a role for UBR5-mediated  
272 degradation. Therefore, UBR5 appeared to only suppress canonical HH signalling associated with  
273 overexpression of GLI1.

274 We then addressed whether loss of *Ubr5* function would also affect cAMP production as  
275 a readout of  $G_i$  protein activity, an indirect marker of non-canonical HH signalling. *Ubr5* shRNA  
276 cells showed an ~2-fold increase in maximal cAMP production in response to forskolin, an  
277 adenylate cyclase agonist (Fig 9D) [33]. Moreover, simultaneous addition of forskolin and  
278 purmorphamine, a SMO agonist, lowered maximal cAMP generation, but its effect was  
279 suppressed by *Ubr5* shRNA (Fig 9 D). Together, the *in vitro* findings suggest that *Ubr5* loss results  
280 in reduced stimulation of  $G_i$  proteins by Smo, leading to increased cAMP/PKA activity levels.  
281 Overall, these data supported our *in vivo* observations that *Ubr5* normally acts to suppress GLI1  
282 activity while promoting PKA activity.

283

## 284 Discussion

## 285 ***Ubr5* mutation causes musculoskeletal tissue defects**

286 We report a role for mammalian *Ubr5* in adult skeletal homeostasis that impacts upon and  
287 genetically interacts with, components of the HH signalling pathway. These findings add to the  
288 emerging importance of the N-end rule ligases in regulating important signalling and cellular  
289 processes in human, and animal health and disease [34, 35]. Loss of the *Ubr5* gene in early limb  
290 mesenchyme resulted in postnatal defects in and around joints within the fore and hind-limb.  
291 Defects included ectopic bone and cartilage formation, and articular cartilage degradation (see  
292 summary S4 Fig 4).

293 Our data indicates metaplastic production of chondrocytes and/or ectopic endochondral  
294 ossification as a major component of *Ubr5<sup>mt</sup>*-associated ECCO. Comparison of the *Ubr5<sup>mt</sup>*-  
295 associated ECCO phenotype with that of human inherited HO diseases reveals some similarities  
296 and differences. Within the ECCO-prone tissues there were distinct tissue-specific responses; for  
297 example, the knee-associated synovium underwent ectopic chondrogenesis, calcification and  
298 ossification to produce bone, whereas the Achilles tendon only underwent ectopic  
299 chondrogenesis and calcification. The abnormalities of the knee-associated synovium which  
300 display heterotopic chondrogenesis are reminiscent of human benign bone tumours called  
301 osteochondromas [36] whereas, the heterotopic tissue calcification without ossification seen in  
302 the AT resembles a form of calcific tendinopathy [37]. The mouse *Ubr5* mutation, thus, provides  
303 a genetic model for the generation of these bone abnormalities and suggests that the processes  
304 of chondrogenesis, tissue calcification and ossification represent discrete, albeit interrelated,  
305 steps that when deregulated can individually, or collectively, contribute to distinct tissue  
306 pathologies.

307 Our findings also demonstrated an important role for *Ubr5* in regulating AC homeostasis,  
308 where its loss led to dramatic cellular, extracellular and structural defects. The observed defects  
309 in HH signalling could have been causative in nature as HH signalling is intimately linked to both

310 stem cell [22] and chondrocyte biology [10]. One of the most distinctive *Ubr5<sup>mt</sup>* AC defects was  
311 the tearing along the tidemark between non-calcified and calcified cartilage. This focal failure  
312 suggested the interface was prone to transverse shear forces and ‘slipping’ of one layer (i.e., non-  
313 calcified cartilage) relative to the other (i.e., calcified cartilage). Interestingly, this mode of AC  
314 shedding and the associated regions of necrosis mirrored defects observed in mammalian  
315 osteochondrosis [38, 39].

316

### 317 **UBR5 influences markers of canonical and non-canonical HH signalling**

318 Based on the current dogma, we hypothesized that the *Ubr5<sup>mt</sup>*-associated ECCO was  
319 caused by increased HH signalling. In contrast, the introduction of *Smo<sup>LoF</sup>* heterozygosity into a  
320 *Ubr5<sup>mt</sup>* background both (i) exacerbated *Ubr5<sup>mt</sup>*-associated defects as well as elicited novel  
321 defects not observed by loss of *Ubr5* function alone (e.g., ECCO of the calcaneal periosteum and  
322 the superficial digital flexor tendons and increased volume and altered shape of normotopic  
323 sesamoid bones). This combined ability to influence both normotopic and heterotopic bones (S4  
324 Fig for summary of ECCO phenotype), highlights the importance of *UBR5* in normal and  
325 pathological skeletal tissue homeostasis. Furthermore, our genetic analysis exposed a pro-  
326 homeostatic function for SMO – and by extension HH signaling – in suppressing *Ubr5<sup>mt</sup>* ECCO.

327 *In vivo* and *in vitro* observations identified a loss of *Ubr5* associated with predictors of increased  
328 (GLI1 activity) and decreased (PKA activity) canonical HH signalling. Based on the current  
329 dogma, it is difficult to reconcile increased GLI activity in the context of increased PKA activity,  
330 given that PKA phosphorylates other GLI family members, GLI2 and GLI3, targeting them for  
331 processing into transcriptional repressors [14, 40]. However, the evolving breadth of the HH  
332 pathway (Fig 9F) provides potential mechanistic explanations for this apparently paradoxical  
333 observation.

334           Recent evidence expanded the role of PKA to promote canonical HH signalling by  
335 promoting BRD4-mediated stimulation of GLIs transcriptional activity (Fig. 9E) [41-43].  
336 Interestingly, HO-associated with increased HH signalling was suppressed by the BRD4 inhibitor  
337 JQ1 [44], which clearly demonstrated a role for a cAMP-PKA-BRD4-GLI1 axis in skeletal tissue  
338 homeostasis. A non-canonical role of SMO as a G protein-coupled receptor (14, 15) provides a  
339 mechanism to control PKA activity. Upon stimulation, SMO activates heterotrimeric G<sub>i</sub> proteins,  
340 which, upon dissociation, inhibit adenylate cyclase through the G<sub>α</sub> subunit to reduce cAMP  
341 production and PKA activation [15, 45, 46]. Therefore, SMO inhibition can lead to increased  
342 cAMP-mediated PKA activity accounting for SMO modification of the *Ubr5<sup>mt</sup>* phenotype, as  
343 impairment of either UBR5 or SMO leads to increased cAMP-mediated PKA activity – with their  
344 combined impairment leading to either additive or synergistic effects. Interestingly, our preliminary  
345 research (personal communicationNDGR) supports a role for UBR5 in regulating readouts of non-  
346 canonical HH signalling other than PKA (i.e.; RhoA ) [16]. Although our data reveal a genetic  
347 interaction between UBR5 and an essential component of the HH signalling pathway, we cannot  
348 fully establish the underlying mechanism(s) driving *Ubr5<sup>mt</sup>*-associated ECCO. Future work will  
349 require developing the tools to differentiate between causative individual, or combined,  
350 contributions of aberrant canonical or non-canonical HH signalling. The addition of *Smo<sup>LoF</sup>* into a  
351 *Ubr5<sup>mt</sup>* background would have exacerbated a pre-existing imbalance between the pathway  
352 outputs to drive ECCO.

353           The importance of balanced canonical and non-canonical HH signalling was recently  
354 demonstrated in osteogenesis [47]. Loss of the cilia regulatory protein IFT80 resulted in impaired  
355 osteoblast differentiation and coincided with (i) decreased expression of canonical target genes  
356 and (ii) increased non-canonical activity. The authors proposed that the non-canonical HH  
357 pathway prevented, and the canonical pathway promoted, formation of osteoblasts. Due to the  
358 emerging importance of non-canonical HH signalling [12], we also propose that the combined  
359 effects on canonical and non-canonical HH signalling contributed to the observed loss of tissue



360 homeostasis in *Ubr5<sup>mt</sup>* animals. Overall, our detection of *Ubr5<sup>mt</sup>*-associated increased canonical  
361 (GLI1 activity) and indications of decreased non-canonical HH signalling (cAMP-PKA) are in  
362 general agreement with a reported pro-osteogenic environment conducive to HO [47]. UBR5 may  
363 therefore join IFT80 [47] and DYRK1B [48] as differential regulators of canonical and non-  
364 canonical HH signalling. Our future work will involve establishing which of the various non-  
365 canonical, SMO's GPCR-associated downstream effectors (e.g., PKA, RHOA, RAC1, PI3K etc.)  
366 [49, 50] drive ECCO.

367 In summary, we reveal a previously unknown role for *Ubr5* in influencing HH signalling,  
368 tissue homeostasis and preventing spontaneous ECCO. A role for UBR5 in regulating HH  
369 signalling and tissue homeostasis supports the classification of human *UBR5* as a Tier 1 human  
370 cancer susceptibility gene (Sanger Cancer Gene Consensus). We believe the *Ubr5<sup>mt</sup>* mouse  
371 model could assist in uncovering mechanisms that lead to disorders including characterisation of  
372 early pathological events and elucidation of pro-homeostatic mechanisms capable of promoting  
373 general bone health. In the future, manipulation of human *UBR5* and *SMO* function could  
374 potentially provide a means of preventing pathological, and promoting beneficial, chondrogenesis  
375 and ossification in both the clinic and in biomedical engineering applications.

376

## 377 **Materials and methods**

378 **Human Material**

379 Human AC was obtained from knee joint arthroplasty specimens with ethical approval from  
380 the Lothian Research Ethics Committee.

381 **Murine studies**

382 Animal studies were approved by the MRC IGMM 'Animal Care and Use Committee' and  
383 according to the MRC 'Responsibility in the Use of Animals for Medical Research' (July 1993),  
384 EU Directive 2010 and UK Home Office Project License no. PPL 60/4424.

385 *Prx1-Cre;Ubr5<sup>gt/gt</sup>* experimental animals (referred to as *Ubr5<sup>mt</sup>*) and their respective  
386 littermate controls were generated and all experiments were conducted in accordance with the  
387 ARRIVE guidelines. Tamoxifen (0.1mg/kg body weight) in corn oil, or vehicle only, were  
388 administered i.p to six-week-old animals on two consecutive days. For X-gal staining, embryos  
389 and postnatal hind limbs were dissected, fixed in 4% formaldehyde (from paraformaldehyde  
390 (PFA)) at 4°C, washed and stained in X-Gal stain solution (XRB supplemented with 1mg/ml X-  
391 Gal) overnight [20].

392 **Histology**

393 Hindlimbs were fixed in 4% formaldehyde (fromPFA)) for 72hrs at 4°C before being  
394 decalcified 0.5M ethylenediaminetetraacetic acid (EDTA) pH7.4 at 4°C. Samples were embedded  
395 in paraffin wax blocks and 5µm sagittal sections cut. For cryotome sectioning, samples were  
396 equilibrated in a 30% sucrose/phosphate buffered saline (PBS) solution at 4°C and then  
397 embedded in OCT compound (Fisher Scientific, Loughborough, UK) before 10µm sagittal  
398 sections were cut. For human material, 8x3mm blocks of AC were cut from femoral tibial condyles  
399 and fixed in neutral buffered formalin and then paraffin wax embedded. Histological staining with  
400 Von Kossa (Abcam, Cambridge, UK), toluidine blue (Sigma) and haematoxylin and eosin (Sigma)  
401 were carried out according to standard procedures. All histological scoring was carried out on the  
402 lateral tibial condyle with AC damage determined by a binary scoring system, of 'normal' or

403 'damaged'. At least three slides separated by 25 $\mu$ m were analysed for each limb. For cell and  
404 immunohistochemical scoring, cell-types or positive staining cells were expressed as a  
405 percentage of the total chondrocyte count. The number of empty lacunae were expressed per  
406 mm of AC analysed.

#### 407 **Immunohistochemistry**

408 *Primary antibodies:* rabbit anti-IHH (1:200, Millipore, Billerica, US); goat anti-PTCH1 (1:50,  
409 Santa Cruz, Dallas, US); rabbit anti-GLI1 (1:50, Cell Signalling); rabbit anti-SOX9 (1:50 Santa  
410 Cruz); rabbit anti-RUNX2 (1:250, Sigma); PKA phosphorylated substrates (1:150, Cell Signalling);  
411 rabbit anti-EDD1 (HsUBR5) (1:100, Bethyl Labs, Montgomery, US). Biotinylated secondary  
412 antibodies: goat anti-rabbit and horse anti-goat (1:200, Vector Labs).

413 Paraffin sections were de-waxed, blocked for endogenous peroxidase and underwent  
414 antigen retrieval in 10mM sodium citrate pH6 at 80°C for 30-60 minutes. Slides were blocked with  
415 serum-free pan-species block (DAKO, Glostrup, Denmark), incubated with primary antibodies  
416 overnight at 4°C, and incubated with biotinylated secondary antibodies for 45mins at room  
417 temperature. Sections underwent streptavidin-mediated signal amplification (ELITE ABC,  
418 Vectorlabs, Burlingame, US) prior to incubation with peroxidase substrate kit DAB (Vectorlabs).

#### 419 **$\mu$ CT image processing**

420 Fixed limbs were imaged at 18 $\mu$ m resolution using a Skycan 1076 (Bruker, USA, MA).  
421 Raw  $\mu$ CT image stacks was reconstructed and CTAn (Bruker) used for selecting regions of  
422 interest and acquiring 2D density maps, volumetric quantification of ectopic structures and  
423 generation of surface rendered 3D models (visualized in CTVol). For 3D density mapping of the  
424 tibial epiphysis, individual pan-, low- and high-3D density map models were combined using  
425 CTVol.

426

427 **RNA extraction and q-RT-PCR analysis**

428 Individual joint components were micro-dissected and stored in liquid nitrogen. RNA was  
429 extracted using Trizol reagent (Life Technologies), according to manufacturer's instructions. RNA  
430 was reverse-transcribed using QuantiTect Reverse Transcription Kit (Qiagen). The qRT-PCR was  
431 performed using LightCycler® 480 SYBR Green I Master (Roche, Germany) and target gene  
432 expression normalized to *Rpl5* and analysed using the  $\Delta\Delta CT$  method [51].

433 **Plasmid constructs**

434 The *Shh* and *SmoM2* (W593L) expression vectors were provided by P. Beachy (Stanford  
435 University, USA, CA). *mGli1* expression and the reporter vectors *8xGBS-luc* were a gift from H.  
436 Sasaki (Osaka University, Japan). *pCMV-dR8.2 dvpr* (8455) and *pCMV-VSV-G* (8454) were  
437 generated in the Weiner lab and obtained from Addgene (USA). *pRL-TK* was obtained from  
438 Promega (USA) and *pcDNA3.1+* was purchased from Invitrogen (USA). Recombinant SHH ligand  
439 was synthesized and purified as described previously [52].

440 The complete *Ubr5* cDNA was synthesised from murine embryonic stem cells total RNA  
441 [9] and cloned into a modified pcDNA5/FRT vector (Life Technologies) containing an amino-  
442 terminal 2×HA/2×Strep. NIH3T3 cells (American Type Culture Collection, USA) were seeded at  
443 a density of 100,000/ml and transfected after 24hr with *pcDNA3.1* alone, *UBR5* and *pcDNA3.1*,  
444 *Gli1* and *pcDNA3.1*, or *Gli1* and *Ubr5* using FuGENE6 (Roche). After 48hrs, the medium was  
445 replaced by DMEM/0.5% FCS, and cells were lysed 24 hrs later in Laemmli buffer. Whole cell  
446 lysate was separated on a 6% SDS-PAGE and transferred onto nitrocellulose membranes.  
447 Membranes were blocked in 5% non-fat milk, incubated with primary antibodies overnight at 4°C  
448 at 1:1,000 dilution for GLI1 (Cell Signalling) or 1:10,000 dilution for  $\beta$ -actin (Sigma). Secondary  
449 HRP-conjugated-anti-mouse antibody was applied at a 1:2,000 dilution for 1hr at room  
450 temperature. The membranes were developed using the Clarity western ECL substrate (BioRad,  
451 USA, CA).

## 452 **Retrovirus production and stable *Ubr5* silencing**

453 Previously validated shRNA-encoding oligos targeting murine *Ubr5* and or a scrambled  
454 sequence were cloned into *pLKO.1-puro* (Sigma). *shUBR5* and *shScrambled-pLKO.1-puro* were  
455 co-transfected with *pCMV-VSV-G* and *pCMV-dR8.2 dvpr* plasmids into HEK 293T cells using  
456 TransIT293 reagent (Mirus Bio LLC, USA). To generate stable silenced *shUBR5* cells, NIH3T3  
457 cells were seeded at 120,000 cells/ml and infected with 0.5 ml *shScramble* or *shUBR5* retroviral  
458 supernatant in the presence of 8 mg/ml polybrene (Sigma). The media was changed after 24 hrs  
459 and cells were selected with 2 mg/ml puromycin 48 hrs post-infection.

## 460 ***Gli*-luciferase assay**

461 NIH3T3 cells were seeded, and after reaching 70% confluence transfected with  
462 *pcDNA3.1*, *Shh*, *SmoM2*, or *Gli1* together with *Gli*-luciferase and *Renilla luciferase* reporter  
463 plasmids with or without *pcDNA5-HA-Strep-Ubr5*, using FuGENE 6 transfection reagent (Roche)  
464 according to the manufacturer's protocol. For *Ubr5* knockdown studies, stable *shScramble* and  
465 *shUbr5* NIH3T3 cells were transfected with *pcDNA3.1*, *Shh*, *SmoM2*, or *Gli1*, together with *Gli*-  
466 luciferase and *Renilla luciferase* reporter plasmids. In both cases, after the cells reached 100%  
467 confluency, the medium was replaced with DMEM/0.5% FCS. After 24 hrs, Firefly and *Renilla*  
468 luciferase activities were determined with the Dual Luciferase Reporter Assay System (Promega).

## 469 **cAMP assay**

470 Control (scrambled) or knock down (*Ubr5* shRNA) NIH3T3 cells were seeded at 130,000  
471 cells/ml, serum starved overnight, and stimulated with 10 $\mu$ M forskolin (FORSK) for 5min. Cells  
472 were pre-incubated with 5 $\mu$ M purmorphamine for 10min before addition of FORSK. Cells were  
473 processed according to Parameter cAMP Enzyme Immune Assay (R&D Systems) instructions.

## 474 **Statistical analysis**

475 Data analysis and statistics was performed using PRISM software (GraphPad, La Jolla,  
476 US). Count data was analysed using a contingency table and either two-sided Chi square or

477 Fisher's exact tests according to count size. Continuous data was analysed using unpaired, two-  
478 tailed Students t-tests. The level of significance for all tests was set at  $p < 0.05$ .

## 479 **Acknowledgements**

480 We would like to thank Lorraine Rose and Rob v'ant Hof for preliminary  $\mu$ CT scanning and the  
481 SURF and IGMM Histology facilities for their services. We also thank the BRF for expert technical  
482 assistance.

483 **Funding:** MD is supported by a University of Edinburgh Chancellor's Fellowship and funding from  
484 a Carnegie Research Incentive Grant (70356); BH and SP by a MRC core award to the MRC  
485 HGU; and KS by the MRC (MR/R022240/1). CF supported by BBSRC through an Institute  
486 Strategic Programme Grant Funding (BB/J004316/1).

487

488

489

## 490 **References**

491

- 492 1. Hershko A, Ciechanover A, Rose IA. Identification of the active amino acid residue of the  
493 polypeptide of ATP-dependent protein breakdown. *J Biol Chem.* 1981;256(4):1525-8. Epub  
494 1981/02/25. PubMed PMID: 6257674.
- 495 2. Mitch WE, Goldberg AL. Mechanisms of muscle wasting. The role of the ubiquitin-  
496 proteasome pathway. *N Engl J Med.* 1996;335(25):1897-905. Epub 1996/12/19. doi:  
497 10.1056/NEJM199612193352507. PubMed PMID: 8948566.
- 498 3. Mukhopadhyay D, Riezman H. Proteasome-independent functions of ubiquitin in  
499 endocytosis and signaling. *Science.* 2007;315(5809):201-5. Epub 2007/01/16. doi:  
500 10.1126/science.1127085. PubMed PMID: 17218518.
- 501 4. Schnell JD, Hicke L. Non-traditional functions of ubiquitin and ubiquitin-binding proteins.  
502 *J Biol Chem.* 2003;278(38):35857-60. Epub 2003/07/16. doi: 10.1074/jbc.R300018200. PubMed  
503 PMID: 12860974.
- 504 5. Mansfield E, Hersperger E, Biggs J, Shearn A. Genetic and molecular analysis of  
505 hyperplastic discs, a gene whose product is required for regulation of cell proliferation in  
506 *Drosophila melanogaster* imaginal discs and germ cells. *Dev Biol.* 1994;165(2):507-26. Epub  
507 1994/10/01. doi: 10.1006/dbio.1994.1271. PubMed PMID: 7958417.
- 508 6. Lee JD, Amanai K, Shearn A, Treisman JE. The ubiquitin ligase Hyperplastic discs  
509 negatively regulates hedgehog and decapentaplegic expression by independent mechanisms.  
510 *Development.* 2002;129(24):5697-706. Epub 2002/11/08. doi: 10.1242/dev.00159. PubMed  
511 PMID: 12421709.
- 512 7. Moncrieff S, Moncan M, Scialpi F, Ditzel M. Regulation of hedgehog Ligand Expression  
513 by the N-End Rule Ubiquitin-Protein Ligase Hyperplastic Discs and the *Drosophila* GSK3beta  
514 Homologue, Shaggy. *PLoS One.* 2015;10(9):e0136760. Epub 2015/09/04. doi:

- 515 10.1371/journal.pone.0136760. PubMed PMID: 26334301; PubMed Central PMCID:  
516 PMCPMC4559392.
- 517 8. Wang G, Tang X, Chen Y, Cao J, Huang Q, Ling X, et al. Hyperplastic discs differentially  
518 regulates the transcriptional outputs of hedgehog signaling. *Mech Dev.* 2014;133:117-25. Epub  
519 2014/05/24. doi: 10.1016/j.mod.2014.05.002. PubMed PMID: 24854243; PubMed Central  
520 PMCID: PMCPMC4351657.
- 521 9. Kinsella E, Dora N, Mellis D, Lettice L, Deveney P, Hill R, et al. Use of a Conditional  
522 Ubr5 Mutant Allele to Investigate the Role of an N-End Rule Ubiquitin-Protein Ligase in  
523 Hedgehog Signalling and Embryonic Limb Development. *PLoS One.* 2016;11(6):e0157079.  
524 Epub 2016/06/15. doi: 10.1371/journal.pone.0157079. PubMed PMID: 27299863; PubMed  
525 Central PMCID: PMCPMC4907512.
- 526 10. Alman BA. The role of hedgehog signalling in skeletal health and disease. *Nat Rev*  
527 *Rheumatol.* 2015;11(9):552-60. Epub 2015/06/17. doi: 10.1038/nrrheum.2015.84. PubMed  
528 PMID: 26077918.
- 529 11. Briscoe J, Therond PP. The mechanisms of Hedgehog signalling and its roles in  
530 development and disease. *Nat Rev Mol Cell Biol.* 2013;14(7):416-29. Epub 2013/05/31. doi:  
531 10.1038/nrm3598. PubMed PMID: 23719536.
- 532 12. Teperino R, Aberger F, Esterbauer H, Riobo N, Pospisilik JA. Canonical and non-  
533 canonical Hedgehog signalling and the control of metabolism. *Semin Cell Dev Biol.* 2014;33:81-  
534 92. Epub 2014/05/28. doi: 10.1016/j.semcdb.2014.05.007. PubMed PMID: 24862854; PubMed  
535 Central PMCID: PMCPMC4130743.
- 536 13. Pandit T, Ogden SK. Contributions of Noncanonical Smoothed Signaling During  
537 Embryonic Development. *J Dev Biol.* 2017;5(4). Epub 2018/02/06. doi: 10.3390/jdb5040011.  
538 PubMed PMID: 29399514; PubMed Central PMCID: PMCPMC5794034.
- 539 14. Riobo NA, Saucy B, Dilizio C, Manning DR. Activation of heterotrimeric G proteins by  
540 Smoothed. *Proc Natl Acad Sci U S A.* 2006;103(33):12607-12. Epub 2006/08/04. doi:



- 541 10.1073/pnas.0600880103. PubMed PMID: 16885213; PubMed Central PMCID:  
542 PMCPMC1567926.
- 543 15. Shen F, Cheng L, Douglas AE, Riobo NA, Manning DR. Smoothed is a fully  
544 competent activator of the heterotrimeric G protein G(i). *Mol Pharmacol.* 2013;83(3):691-7.  
545 Epub 2013/01/08. doi: 10.1124/mol.112.082511. PubMed PMID: 23292797; PubMed Central  
546 PMCID: PMCPMC3583497.
- 547 16. Polizio AH, Chinchilla P, Chen X, Kim S, Manning DR, Riobo NA. Heterotrimeric Gi  
548 proteins link Hedgehog signaling to activation of Rho small GTPases to promote fibroblast  
549 migration. *J Biol Chem.* 2011;286(22):19589-96. Epub 2011/04/09. doi:  
550 10.1074/jbc.M110.197111. PubMed PMID: 21474452; PubMed Central PMCID:  
551 PMCPMC3103338.
- 552 17. Polizio AH, Chinchilla P, Chen X, Manning DR, Riobo NA. Sonic Hedgehog activates the  
553 GTPases Rac1 and RhoA in a Gli-independent manner through coupling of smoothed to Gi  
554 proteins. *Sci Signal.* 2011;4(200):pt7. Epub 2011/11/25. doi: 10.1126/scisignal.2002396.  
555 PubMed PMID: 22114142; PubMed Central PMCID: PMCPMC5811764.
- 556 18. Long F, Ornitz DM. Development of the endochondral skeleton. *Cold Spring Harb*  
557 *Perspect Biol.* 2013;5(1):a008334. Epub 2013/01/04. doi: 10.1101/cshperspect.a008334.  
558 PubMed PMID: 23284041; PubMed Central PMCID: PMCPMC3579395.
- 559 19. St-Jacques B, Hammerschmidt M, McMahon AP. Indian hedgehog signaling regulates  
560 proliferation and differentiation of chondrocytes and is essential for bone formation. *Genes Dev.*  
561 1999;13(16):2072-86. Epub 1999/08/31. doi: 10.1101/gad.13.16.2072. PubMed PMID:  
562 10465785; PubMed Central PMCID: PMCPMC316949.
- 563 20. Karp SJ, Schipani E, St-Jacques B, Hunzelman J, Kronenberg H, McMahon AP. Indian  
564 hedgehog coordinates endochondral bone growth and morphogenesis via parathyroid hormone  
565 related-protein-dependent and -independent pathways. *Development.* 2000;127(3):543-8. Epub  
566 2000/01/13. PubMed PMID: 10631175.

- 567 21. Yang J, Andre P, Ye L, Yang YZ. The Hedgehog signalling pathway in bone formation.  
568 Int J Oral Sci. 2015;7(2):73-9. Epub 2015/05/30. doi: 10.1038/ijos.2015.14. PubMed PMID:  
569 26023726; PubMed Central PMCID: PMC4817553.
- 570 22. Petrova R, Joyner AL. Roles for Hedgehog signaling in adult organ homeostasis and  
571 repair. Development. 2014;141(18):3445-57. Epub 2014/09/04. doi: 10.1242/dev.083691.  
572 PubMed PMID: 25183867; PubMed Central PMCID: PMC4197719.
- 573 23. Peng T, Frank DB, Kadzik RS, Morley MP, Rathi KS, Wang T, et al. Hedgehog actively  
574 maintains adult lung quiescence and regulates repair and regeneration. Nature.  
575 2015;526(7574):578-82. Epub 2015/10/06. doi: 10.1038/nature14984. PubMed PMID:  
576 26436454; PubMed Central PMCID: PMC4713039.
- 577 24. Cholok D, Chung MT, Ranganathan K, Ucer S, Day D, Davis TA, et al. Heterotopic  
578 ossification and the elucidation of pathologic differentiation. Bone. 2018;109:12-21. Epub  
579 2017/10/11. doi: 10.1016/j.bone.2017.09.019. PubMed PMID: 28987285; PubMed Central  
580 PMCID: PMC6585944.
- 581 25. Regard JB, Malhotra D, Gvozdenovic-Jeremic J, Josey M, Chen M, Weinstein LS, et al.  
582 Activation of Hedgehog signaling by loss of GNAS causes heterotopic ossification. Nat Med.  
583 2013;19(11):1505-12. Epub 2013/10/01. doi: 10.1038/nm.3314. PubMed PMID: 24076664;  
584 PubMed Central PMCID: PMC3917515.
- 585 26. Hopyan S, Nadesan P, Yu C, Wunder J, Alman BA. Dysregulation of hedgehog  
586 signalling predisposes to synovial chondromatosis. J Pathol. 2005;206(2):143-50. Epub  
587 2005/04/19. doi: 10.1002/path.1761. PubMed PMID: 15834844.
- 588 27. Lin AC, Seeto BL, Bartoszko JM, Khoury MA, Whetstone H, Ho L, et al. Modulating  
589 hedgehog signaling can attenuate the severity of osteoarthritis. Nat Med. 2009;15(12):1421-5.  
590 Epub 2009/11/17. doi: 10.1038/nm.2055. PubMed PMID: 19915594.
- 591 28. Zhou J, Chen Q, Lanske B, Fleming BC, Terek R, Wei X, et al. Disrupting the Indian  
592 hedgehog signaling pathway in vivo attenuates surgically induced osteoarthritis progression in

- 593 Col2a1-CreERT2; *Ihhfl/fl* mice. *Arthritis Res Ther*. 2014;16(1):R11. Epub 2014/01/17. doi:  
594 10.1186/ar4437. PubMed PMID: 24428864; PubMed Central PMCID: PMC3978435.
- 595 29. Saunders DN, Hird SL, Withington SL, Dunwoodie SL, Henderson MJ, Biben C, et al.  
596 Edd, the murine hyperplastic disc gene, is essential for yolk sac vascularization and  
597 chorioallantoic fusion. *Mol Cell Biol*. 2004;24(16):7225-34. Epub 2004/07/30. doi:  
598 10.1128/MCB.24.16.7225-7234.2004. PubMed PMID: 15282321; PubMed Central PMCID:  
599 PMCPMC479729.
- 600 30. Logan M, Martin JF, Nagy A, Lobe C, Olson EN, Tabin CJ. Expression of Cre  
601 Recombinase in the developing mouse limb bud driven by a *Prxl* enhancer. *Genesis*.  
602 2002;33(2):77-80. Epub 2002/07/12. doi: 10.1002/gene.10092. PubMed PMID: 12112875.
- 603 31. Long F, Zhang XM, Karp S, Yang Y, McMahon AP. Genetic manipulation of hedgehog  
604 signaling in the endochondral skeleton reveals a direct role in the regulation of chondrocyte  
605 proliferation. *Development*. 2001;128(24):5099-108. Epub 2001/12/19. PubMed PMID:  
606 11748145.
- 607 32. Xiao WF, Li YS, Deng A, Yang YT, He M. Functional role of hedgehog pathway in  
608 osteoarthritis. *Cell Biochem Funct*. 2020;38(2):122-9. Epub 2019/12/14. doi: 10.1002/cbf.3448.  
609 PubMed PMID: 31833076.
- 610 33. Metzger H, Lindner E. The positive inotropic-acting forskolin, a potent adenylate cyclase  
611 activator. *Arzneimittelforschung*. 1981;31(8):1248-50. Epub 1981/01/01. PubMed PMID:  
612 7197529.
- 613 34. Tasaki T, Sriram SM, Park KS, Kwon YT. The N-end rule pathway. *Annu Rev Biochem*.  
614 2012;81:261-89. Epub 2012/04/25. doi: 10.1146/annurev-biochem-051710-093308. PubMed  
615 PMID: 22524314; PubMed Central PMCID: PMC3610525.
- 616 35. Gibbs DJ, Bacardit J, Bachmair A, Holdsworth MJ. The eukaryotic N-end rule pathway:  
617 conserved mechanisms and diverse functions. *Trends Cell Biol*. 2014;24(10):603-11. Epub  
618 2014/05/31. doi: 10.1016/j.tcb.2014.05.001. PubMed PMID: 24874449.

- 619 36. Hakim DN, Pelly T, Kulendran M, Caris JA. Benign tumours of the bone: A review. J  
620 Bone Oncol. 2015;4(2):37-41. Epub 2015/11/19. doi: 10.1016/j.jbo.2015.02.001. PubMed PMID:  
621 26579486; PubMed Central PMCID: PMC4620948.
- 622 37. Oliva F, Via AG, Maffulli N. Physiopathology of intratendinous calcific deposition. BMC  
623 Med. 2012;10:95. Epub 2012/08/25. doi: 10.1186/1741-7015-10-95. PubMed PMID: 22917025;  
624 PubMed Central PMCID: PMC3482552.
- 625 38. McCoy AM, Toth F, Dolvik NI, Ekman S, Ellermann J, Olstad K, et al. Articular  
626 osteochondrosis: a comparison of naturally-occurring human and animal disease. Osteoarthritis  
627 Cartilage. 2013;21(11):1638-47. Epub 2013/08/21. doi: 10.1016/j.joca.2013.08.011. PubMed  
628 PMID: 23954774; PubMed Central PMCID: PMC3815567.
- 629 39. Carey JL, Wall EJ, Grimm NL, Ganley TJ, Edmonds EW, Anderson AF, et al. Novel  
630 Arthroscopic Classification of Osteochondritis Dissecans of the Knee: A Multicenter Reliability  
631 Study. Am J Sports Med. 2016;44(7):1694-8. Epub 2016/05/10. doi:  
632 10.1177/0363546516637175. PubMed PMID: 27159302.
- 633 40. Wang B, Fallon JF, Beachy PA. Hedgehog-regulated processing of Gli3 produces an  
634 anterior/posterior repressor gradient in the developing vertebrate limb. Cell. 2000;100(4):423-  
635 34. Epub 2000/02/29. doi: 10.1016/s0092-8674(00)80678-9. PubMed PMID: 10693759.
- 636 41. Long J, Li B, Rodriguez-Blanco J, Pastori C, Volmar CH, Wahlestedt C, et al. The BET  
637 bromodomain inhibitor I-BET151 acts downstream of smoothed protein to abrogate the  
638 growth of hedgehog protein-driven cancers. J Biol Chem. 2014;289(51):35494-502. Epub  
639 2014/10/31. doi: 10.1074/jbc.M114.595348. PubMed PMID: 25355313; PubMed Central  
640 PMCID: PMC4271234.
- 641 42. Tang Y, Gholamin S, Schubert S, Willardson MI, Lee A, Bandopadhyay P, et al.  
642 Epigenetic targeting of Hedgehog pathway transcriptional output through BET bromodomain  
643 inhibition. Nat Med. 2014;20(7):732-40. Epub 2014/06/30. doi: 10.1038/nm.3613. PubMed  
644 PMID: 24973920; PubMed Central PMCID: PMC4108909.

- 645 43. Martin RD, Sun Y, MacKinnon S, Cuccia L, Page V, Hebert TE, et al. Differential  
646 Activation of P-TEFb Complexes in the Development of Cardiomyocyte Hypertrophy following  
647 Activation of Distinct G Protein-Coupled Receptors. *Mol Cell Biol.* 2020;40(14). Epub  
648 2020/04/29. doi: 10.1128/MCB.00048-20. PubMed PMID: 32341082; PubMed Central PMCID:  
649 PMCPMC7324848.
- 650 44. Feng H, Xing W, Han Y, Sun J, Kong M, Gao B, et al. Tendon-derived cathepsin K-  
651 expressing progenitor cells activate Hedgehog signaling to drive heterotopic ossification. *J Clin*  
652 *Invest.* 2020. Epub 2020/08/28. doi: 10.1172/jci132518. PubMed PMID: 32853181.
- 653 45. Carbe CJ, Cheng L, Addya S, Gold JI, Gao E, Koch WJ, et al. Gi proteins mediate  
654 activation of the canonical hedgehog pathway in the myocardium. *Am J Physiol Heart Circ*  
655 *Physiol.* 2014;307(1):H66-72. Epub 2014/05/13. doi: 10.1152/ajpheart.00166.2014. PubMed  
656 PMID: 24816261; PubMed Central PMCID: PMCPMC4080174.
- 657 46. Cheng L, Al-Owais M, Covarrubias ML, Koch WJ, Manning DR, Peers C, et al. Coupling  
658 of Smoothed to inhibitory G proteins reduces voltage-gated K(+) currents in cardiomyocytes  
659 and prolongs cardiac action potential duration. *J Biol Chem.* 2018;293(28):11022-32. Epub  
660 2018/05/29. doi: 10.1074/jbc.RA118.001989. PubMed PMID: 29802197; PubMed Central  
661 PMCID: PMCPMC6052211.
- 662 47. Yuan X, Cao J, He X, Serra R, Qu J, Cao X, et al. Ciliary IFT80 balances canonical  
663 versus non-canonical hedgehog signalling for osteoblast differentiation. *Nat Commun.*  
664 2016;7:11024. Epub 2016/03/22. doi: 10.1038/ncomms11024. PubMed PMID: 26996322;  
665 PubMed Central PMCID: PMCPMC4802171.
- 666 48. Singh R, Dhanyamraju PK, Lauth M. DYRK1B blocks canonical and promotes non-  
667 canonical Hedgehog signaling through activation of the mTOR/AKT pathway. *Oncotarget.*  
668 2017;8(1):833-45. Epub 2016/12/03. doi: 10.18632/oncotarget.13662. PubMed PMID:  
669 27903983; PubMed Central PMCID: PMCPMC5352201.

- 670 49. Mukhopadhyay S, Rohatgi R. G-protein-coupled receptors, Hedgehog signaling and  
671 primary cilia. *Semin Cell Dev Biol.* 2014;33:63-72. Epub 2014/05/23. doi:  
672 10.1016/j.semcdb.2014.05.002. PubMed PMID: 24845016; PubMed Central PMCID:  
673 PMC4130902.
- 674 50. O'Hayre M, Degese MS, Gutkind JS. Novel insights into G protein and G protein-coupled  
675 receptor signaling in cancer. *Curr Opin Cell Biol.* 2014;27:126-35. Epub 2014/02/11. doi:  
676 10.1016/j.ceb.2014.01.005. PubMed PMID: 24508914; PubMed Central PMCID:  
677 PMC4021379.
- 678 51. Rao X, Huang X, Zhou Z, Lin X. An improvement of the  $2^{(-\Delta\Delta CT)}$  method for  
679 quantitative real-time polymerase chain reaction data analysis. *Biostat Bioinforma Biomath.*  
680 2013;3(3):71-85. Epub 2013/08/01. PubMed PMID: 25558171; PubMed Central PMCID:  
681 PMC4280562.
- 682 52. Martinez-Chinchilla P, Riobo NA. Purification and bioassay of hedgehog ligands for the  
683 study of cell death and survival. *Methods Enzymol.* 2008;446:189-204. Epub 2008/07/08. doi:  
684 10.1016/S0076-6879(08)01611-X. PubMed PMID: 18603123.
- 685

686 **Figure Legends**

687 **Figure 1. *Ubr5<sup>mt</sup>* animals exhibit multiple ectopic structures around the knee and ankle**  
688 **joints.**

689 6-month old control and *Ubr5<sup>mt</sup>* animals were analysed by  $\mu$ CT. (A, B) Color-coded density maps  
690 revealed presence of ectopic, non-uniform density structures (open arrowheads) around the tibia  
691 (closed arrowheads) and femoral condyles (arrows). (C, D) Knee joints in ventral (upper panels)  
692 or medial (lower panels) aspect. Closed arrowheads indicate normal structures: the patella (Pa),  
693 menisci (Mn) and fabella (Fb). Open arrowheads indicate ectopic signals (Es) present in the  
694 *Ubr5<sup>mt</sup>* knee joint. (E) Control ankle joints exhibit a signal extending from the ventral face of the  
695 tibia (closed arrowhead) and a small structure presumed to be a sesamoid bone (arrow). (F)  
696 Multiple ectopic signals were present around the *Ubr5<sup>mt</sup>* ankle joint (arrowheads), including a large  
697 dorsally located and well-isolated structure in the location of the AT (open arrowhead). (G) Higher  
698 magnification of multiple ectopic signals (open arrowheads). (H-Q) 20-week-old *Prx1-Cre* control  
699 and *Ubr5<sup>mt</sup>* ankle and knee joints were stained for  $\beta$ -gal activity. Whole mount knee (H,I) and ankle  
700 (J,K) are shown with subsequent sagittal sections for the knee (L) and the boxed area magnified  
701 in (M) shows the outer layer of the menisci (open arrowhead), and the adjacent synovium (closed  
702 arrowhead) stained positive for  $\beta$ -gal expression. Sagittal sections for the ankle are shown in (N)  
703 and magnified in (O) showing staining of the AT and superficial digital flexor tendon (open and  
704 closed arrowheads, respectively). (P,Q) Expression of  $\beta$ -gal in the articular cartilage of the knee  
705 and the box in P shown at higher magnification in Q.

706

707 **Figure 2. *Ubr5<sup>mt</sup>* limbs exhibit ectopic chondrogenesis, cartilage formation and**  
708 **calcification and ossification.**

709 (A-D) Colour-coded X-ray density maps of volume rendered *Ubr5<sup>mt</sup>* knee (A,B) and ankle (C,D)  
710 joints. (B,D) show cross-sections through the joint to reveal the internal structure and density.  
711 Arrowheads indicate ectopic structures. Low density = blue and High density = red. Sagittal

712 sections from (E-L) 20-week-old or (M-P) 24-week-old animals are shown. (E,F) Von Kossa  
713 staining of *Ubr5<sup>mt</sup>* ankle joints revealed ectopic signals in AT (arrowheads). The dashed boxed  
714 region is enlarged in (F) and shows the shape and location of the ectopic structure on the deep  
715 face of the AT. (G,I) H&E and (H,J) toluidine blue staining of the midbody of Achilles tendons. The  
716 left panel of each pair shows a low magnification image of the tendon. A higher magnification of  
717 the boxed region is shown in the right panel. (G,H) Control tendons showed the expected columns  
718 of tenocytes and very little toluidine blue staining. (I,J) *Ubr5<sup>mt</sup>* tendons harbour chondrocytes that  
719 coincide with regions of toluidine blue staining. (K) Von Kossa staining of *Ubr5<sup>mt</sup>* knee joints  
720 revealed ectopic signals in the synovium (arrowhead). (L) shows an enlarged image of the ectopic  
721 structure lying within the synovium and under the patellar tendon. (M,N) Image of control  
722 synovium (arrowhead) located underneath the patella (Pa) and patellar tendon (PT) and adjacent  
723 to the tibial articular cartilage (AC). The boxed area in (M) is enlarged in (N). (O-P) *Ubr5<sup>mt</sup>*  
724 synovium harbours ectopic tissue. (O) The synovium harbours a bone-like structure (arrowhead).  
725 (P) In other regions, the synovium abutting the patella appeared thickened but not ossified  
726 showing cartilage harbouring chondrocytes. Pt = patellar tendon; Pa = patella; Mn = meniscus

727

728 **Figure 3. *Ubr5<sup>mt</sup>* animals show subchondral bone defects and AC cellular and extracellular**  
729 **abnormalities**

730 (A, D) Surface rendered  $\mu$ CT-based 3D models images of knee joints of *Prx1-Cre* (Control) (A)  
731 and *Ubr5<sup>mt</sup>* (D). Volume rendered 3D models of 26-week-old tibial subchondral bone; (B, E)  
732 ventral, and (C, F) anterior views. Pan-density volume shown in grey, high-density in red and low-  
733 density in blue. (G) Graph of percentage of high-density signal volume as a percentage of total  
734 subchondral bone volume. s.e.m indicated. n = three biological replicates per genotype. t-test. p  
735 = 0.0103. H&E-based histological analysis of (H-J) 26-week-old *Prx1-Cre* (Control) and *Ubr5<sup>mt</sup>*  
736 tissues. (H) 26-week-old control tibial AC was normal and (I) *Ubr5<sup>mt</sup>* AC exhibited regions that  
737 lacked AC and exposed subchondral bone (dashed lines). Peripheral regions retained some AC



738 (white arrowheads). (J) Closer examination revealed exposed subchondral bone (black  
739 arrowheads) and intercalated cartilage (white arrowheads). (K) Graph of % sections with exposed  
740 bone in 26-week-old tibial AC reveal a significant increase in *Ubr5<sup>mt</sup>* AC. Fishers exact test on  
741 pooled slide counts,  $p=0.0075$ .

742

743 **Figure 4. *Ubr5<sup>mt</sup>* mice exhibit degenerative, age related defects.**

744 (A-D) Consecutive uCT scans of a live *Ubr5<sup>mt</sup>* animals at the indicated ages. *Ubr5<sup>mt</sup>* ankles form  
745 (i) ventral ectopic signals (arrowheads) around (B) 12 weeks of age and (ii) dorsal ectopic signals  
746 around (C) 16 weeks of age that (D) increased in size over time. Three-week-old knee joints,  
747 stained with H&E, of *Prx1-Cre* (control) (E) and *Ubr5<sup>mt</sup>* (F). Black dashed lines in (F) demarcate  
748 the *Ubr5<sup>mt</sup>* apical acellular region. (G-M) Six-week-old (G,H) *Prx1-Cre* (control) and (I,J,L) *Ubr5<sup>mt</sup>*  
749 proximal tibial AC were analysed. (G,H) Control AC revealed the expected chondrocyte profile  
750 along the apical to basal axis, namely (I) superficial chondrocytes lining the apical surface; (II)  
751 non-hypertrophic rounded/oblong nuclei chondrocytes; (III) larger pre-hypertrophic-like  
752 chondrocytes within the central zone; and (IV) large hypertrophic chondrocytes located near the  
753 border with the underlying subchondral bone. SB = subchondral bone. (I) *Ubr5<sup>mt</sup>* tibial AC revealed  
754 abnormal chondrocytes and an acellular apical layer lacking superficial chondrocytes. (K) Graph  
755 of the percentage of superficial chondrocytes in six-week-old tibial AC. N = three biological  
756 replicates of each genotype. Mean and s.e.m indicated. Chi square test on pooled cell counts.  $p$   
757 =  $<0.0001$ . (L) *Ubr5<sup>mt</sup>* tibial AC exhibited clusters of eosin positive chondrocytes (dashed lines)  
758 and multiple tidemarks (arrows). (M) Graph of percentage of eosinophilic chondrocytes in six-  
759 week-old AC. Chi square test on pooled cell counts. N = three biological replicates of each  
760 genotype.  $p = <0.001$ . (N-Q) Postnatal *pCAGG-Cre*-mediated recombination of the *Ubr5<sup>gt</sup>*  
761 construct (O), but not *pCAGG-Cre* expression alone (N), resulted in X-ray dense ectopic signals  
762 forming in the AT region. (P) Counts of animals exhibiting ankle-associated ectopic signals,  
763 scored for the absence (Normal) or presence of ectopic signals (Ectopic),  $n = >4$  for each

764 genotype. Fisher's exact test, p value = 0.0048. (Q) Volumetric measurement of ectopic signals  
765 from each animal n= 4. Unpaired t test, p = 0.0079. Standard error indicated. Control AC (R)  
766 exhibited superficial chondrocytes (arrows). (S) *pCAGG-Ubr5<sup>mt</sup>* AC exhibited an acellular apical  
767 layer (arrowheads), multiple tidemarks (arrows), and surface damage (black arrowhead). (T)  
768 Graph of percentage of sections with acellular regions and AC damage. Mean and s.e.m  
769 indicated. n = three biological replicates. Three slides analysed from each animal. Average  
770 plotted. Fishers exact on pooled section counts. p = 0.0434. (U) *pCAGG-Ubr5<sup>mt</sup>* AC also exhibited  
771 a reduction in superficial chondrocytes and an increase in empty apically-located lacunae  
772 (arrowheads). Graph of (V) superficial chondrocytes and (W) empty lacunae expressed as  
773 number per mm of AC. n = three biological replicates. Analysis of two sections per animal.  
774 Individual slide values plotted. Mean and s.d indicated. Fishers exact test on pooled counts. (E,  
775 F) p = <0.0001.

776

777 **Figure 5. *Smo<sup>LoF</sup>* enhances the *Ubr5<sup>mt</sup>* ECCO phenotype.**

778 Analysis of 12-week-old knee (A-G) and ankle (H-O) joints by  $\mu$ CT-based 3D models. (A-C) *Ubr5<sup>mt</sup>*  
779 and (D-F) *Ubr5<sup>mt</sup>+Smo<sup>LoF</sup>* knee joints revealed ectopic structures marked by red dashed lines and  
780 open arrowheads. Sesamoid bones indicated by closed arrowhead. Asterisk marks an ectopic  
781 structure displacing the patella. All images of surface rendered 3D models, except for (C,F) that  
782 are volume rendered. (G) Volumetric analysis of ectopic structures revealed *Ubr5<sup>mt</sup>+Smo<sup>LoF</sup>*  
783 exhibited a dramatic increase in total ectopic volume over *Ubr5<sup>mt</sup>* alone. Mean and s.e.m  
784 indicated. n = six knees from three animals for each genotype. t-test. p = 0.0002. (H-J) *Ubr5<sup>mt</sup>*  
785 ankle joints exhibited a few small ectopic signals. (K-N) *Ubr5<sup>mt</sup>+Smo<sup>LoF</sup>* ankles joints exhibited  
786 large (closed arrowhead) and small (arrow) ectopic signals in addition to an abnormal and  
787 enlarged calcaneus (open arrowhead). (N) Optical cross sections through volume-rendered  
788 model revealed the internal structure and X-ray densities of the (open arrowhead) calcaneus and  
789 (closed arrowhead) ectopic structure. (O) Volumetric quantification of ectopic structures in the

790 indicated genotypes. n = five animals per genotype. t test, p value = 0.0293. Mean and s.e.m.  
791 indicated.

792

793 **Figure 6. *Smo*<sup>LoF</sup> enhances the *Ubr5*<sup>mt</sup> AC phenotype.**

794 (A) *Ubr5*<sup>mt</sup>+ *Smo*<sup>LoF</sup> synovium exhibited large ectopic tissue deep to the patella and adjacent to  
795 the femur (open arrowhead). Three black dashed boxes, from left to right, are enlarged in (B), (C)  
796 and (D), respectively. (B) Sub-intimal synovial layer abutting the ectopic tissue was highly  
797 vascularized (arrowheads). (C) The region interfacing with the ectopic tissue harboured plump  
798 spindle-like cells and chondroid-like cells (arrowheads). (D) The core of the ectopic tissue  
799 resembled calcified cartilage undergoing endochondral ossification and harboured vascularized  
800 cavities (arrowheads). (E) *Ubr5*<sup>mt</sup>+*Smo*<sup>LoF</sup> ankle exhibited a large ectopic structure (black  
801 arrowhead) and abnormal superficial digital flexor tendon (open arrowhead) and calcaneus  
802 (asterisk). The upper and lower dashed boxed region are enlarged in (F) and (G), respectively.  
803 (F) The ectopic mass contained bone-like (black dashed lines) and cartilaginous tissues (white  
804 dashed lines) surrounded by extensively vascularised synovium (open arrowheads). (G) The  
805 presumed superficial digital flexor tendon attached to the ectopic bone (black arrowhead),  
806 harboured chondrocytes and resembled cartilage (encircled by black dash line). The adjacent  
807 periosteum of the calcaneus was highly vascularised (open arrowheads). (H) Cartilaginous  
808 thickening of the outer calcaneus. (I) The AT was thickened. The dashed box enlarged in (J)  
809 shows columns of chondrocytes (open arrowheads). (K-N) Analysis of 12-week-old knee joints  
810 of *Ubr5*<sup>mt</sup> and *Ubr5*<sup>mt</sup>+*Smo*<sup>LoF</sup> by H&E stained histological sections of the lateral condyles. (K, L)  
811 *Ubr5*<sup>mt</sup> exhibited tears in the AC (open arrowhead) and (M, N) *Ubr5*<sup>mt</sup>+*Smo*<sup>LoF</sup> exhibited extensive  
812 loss of AC (dashed lines) and damaged apical surfaces (arrowhead). Dashed boxes in (K) and  
813 (M) indicate the enlarged regions in (L) and (N), respectively. (O) Percentage of sections bearing  
814 no damage ('None'), tears ('Tears') or exposed calcified cartilage (Exposed), revealed a

815 significance difference between the genotypes. Mean and s.e.m indicated. Chi-square test on  
816 pooled slide counts.  $p = 0.0027$ . (P') *Smo<sup>LoF</sup>* AC showed no signs of AC damage.

817

818 **Figure 7. *Ubr5<sup>mt</sup>* synovium exhibits markers of increased canonical and decreased non-**  
819 **canonical HH signalling.**

820 Immunohistochemical localization of markers of canonical and non-canonical HH signalling (A-L)  
821 six-week-old sagittal sections of *Prx1-Cre* control (Con) and *Ubr5<sup>mt</sup>* animals. In general, control  
822 (A-C) intimal and (G-I) subintimal layers exhibited weaker GLI1 and PPS staining than in  
823 comparable *Ubr5<sup>mt</sup>* sections (D-F and J-L, respectively). (B) GLI1 staining in the control intimal  
824 layer was located to the vasculature (closed arrowheads) and some adipocytes (open  
825 arrowheads). (C) PPS staining was in the vasculature (closed arrowheads) and within adipocytes  
826 (open arrowheads). (E) GLI1 and (F) PPS staining were throughout the subintimal layer. (H) GLI1  
827 staining of control synoviocytes within the subintimal layer (arrowhead). (I) PPS staining in sub-  
828 intimal layer synoviocytes (arrowhead). (K) GLI1 and (L) PPS staining were strongly expressed  
829 within hyperplastic and thickened synovial sub-intimal layer. Synoviocytes exhibited robust  
830 nuclear and cytoplasmic staining for GLI1 (K) and PPS (L). (M) qRT-PCR on synovium RNA for  
831 expression of canonical HH pathway expression markers *Ptch1* and *Gli1*. Graph indicates mean  
832 and s.e.m.  $n = 3$  animals. t-test. *Ptch1*  $p = 0.0273$  and *Gli1*  $p = 0.0477$ .

833

834 **Figure 8. Impaired *Ubr5* function results in increased canonical and decreased non-canonical HH**  
835 **signalling.**

836 Immunohistochemical analysis of six-week-old control and *Ubr5<sup>mt</sup>* tibial AC examined for markers  
837 of canonical HH pathway activity. Relative to (A, C) control, (B, D) *Ubr5<sup>mt</sup>* AC displayed increased  
838 staining intensities for PTCH1 (A, B) and GLI1 (C, D) with GLI1 exhibiting expanded expression  
839 domains (D, double-headed arrows). (E, F) Staining for PKA phosphorylated substrates (PPS)  
840 revealed (Q) *Ubr5<sup>mt</sup>* AC exhibited increased numbers of robust staining cells. The number of

841 expressing cells is quantified in (G-I). Quantification confirmed *Ubr5<sup>mt</sup>* AC to harbour increased  
842 numbers of positive cells for all antigens except PTCH1. Graphs represent the percentage of  
843 positive cells, regardless of staining intensity, with the mean and s.e.m indicated. n=3 biological  
844 replicates. Chi-square test on pooled cells count data.  $p = <0.0008$ , except PTCH1 which was not  
845 significant.

846 **Figure 9. Ubr5 functions as a negative regulator of HH signalling ex vivo.**

847 Analysis of HH pathway activity in murine NIH3T3 cells in response to modulation of Ubr5  
848 expression. (A) Cells were transfected with empty pN21 vector (grey bars) or pN21-*Ubr5* (black  
849 bars) together with plasmids encoding *Shh*, *Smo-M2* or *Gli1* and 8xGLI-Firefly and pTK-Renilla  
850 luciferase reporters in growth medium (DMEM with 10% FBS). After 24 h, serum was reduced to  
851 0.5% and the Firefly/Renilla luciferase activity was measured 48 h later. Bars represent mean +/-  
852 s.e.m. of n = 3 independent experiments. (B) A similar GLI-luciferase assay was carried out in  
853 NIH3T3 cells stably expressing *Ubr5* shRNA (black bars) or *scrambled* shRNA (grey bars). Bars  
854 represent mean +/- s.e.m. of n = 3 independent experiments. (C) NIH3T3 cells were co-  
855 transfected with pN21-*Ubr5* (*Ubr5*) or empty vector (Control) and *Gli1-myc* or empty pcDNA3.1,  
856 followed by Western blot analysis of Gli1 expression (arrowhead) using  $\alpha$ -actin as loading control.  
857 (D) Stable knockdown of *Ubr5* impaired readouts of non-canonical HH signalling. Production of  
858 cAMP by control *scrambled* shRNA (black bars) or *Ubr5* shRNA stable cells (grey bars) following  
859 acute treatment with the adenylate cyclase activator forskolin (For) or forskolin plus the SMO  
860 agonist purmorphamine (For/Pur), compared to DMSO vehicle as control (-). Forskolin-stimulated  
861 cAMP production in *Ubr5* shRNA cells was significantly elevated compared to control cells ( $p =$   
862  $0.0368$ ; *t*-test). Purmorphamine suppressed forskolin-mediated cAMP production in both  
863 scramble control ( $p = 0.0318$ ; *t*-test) and *Ubr5* ( $p = 0.0160$ ; *t*-test) shRNA cell lines. Graphs  
864 indicate mean and s.e.m.; n = 4 independent experiments. (E) Proposed model of UBR5 function  
865 in HH signalling: UBR5 negatively regulates canonical HH signalling downstream of SMO,  
866 hypothetically through facilitating the function of the HH negative regulator Sufu, despite

867 simultaneously inhibiting adenylate cyclase (AC). In this context, loss of Ubr5 could increase Gli1  
868 expression by two means: 1) impairment of Sufu negative regulation and 2) stimulation of Gli1  
869 transcriptional activity by increasing PKA-dependent phosphorylation of BRD4. The convergence  
870 of Ubr5 and SMO to suppress adenylate cyclase activity could explain the phenotypic  
871 enhancement observed in compound mice with loss of function of Ubr5 and Smo. Green and red  
872 arrows indicate established modes of activation and repression, respectively.

Fig. 1

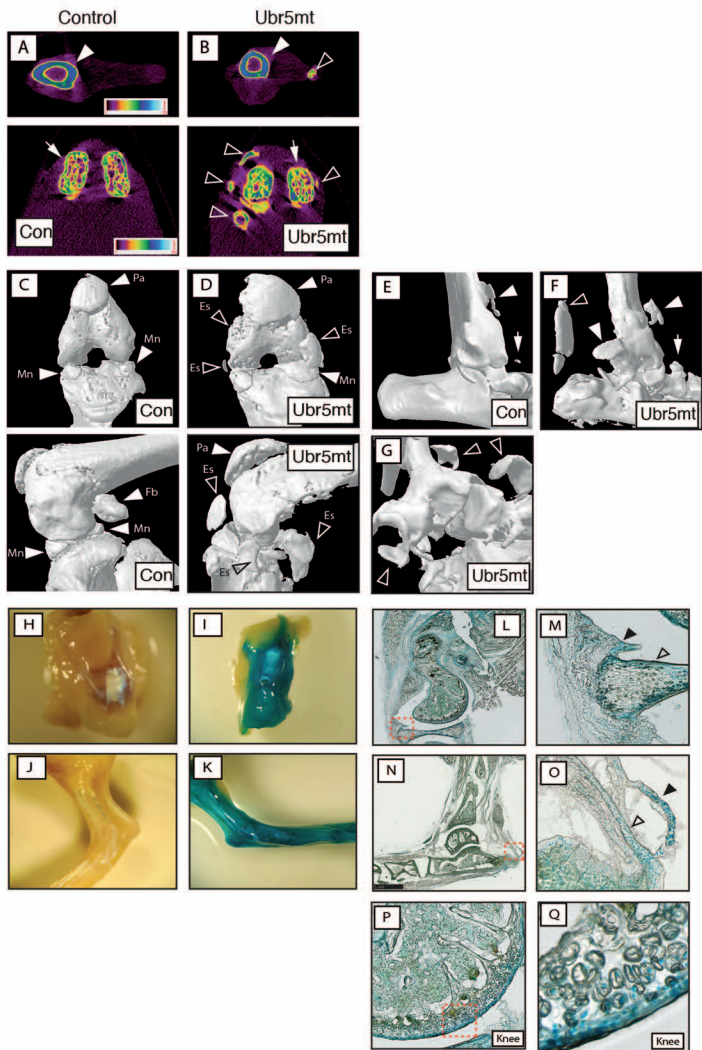

Fig. 2

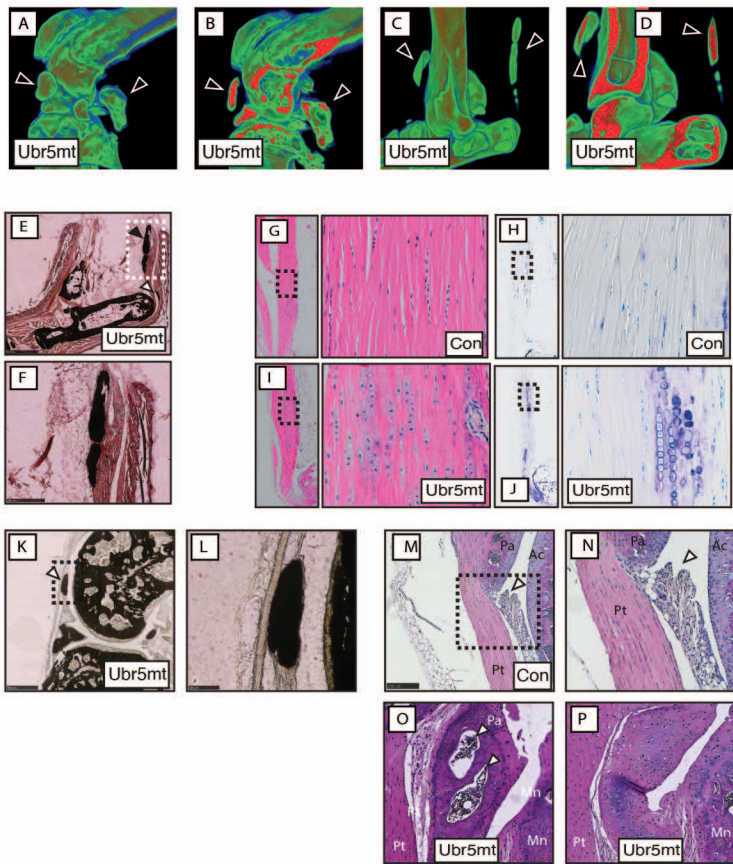



Fig. 3

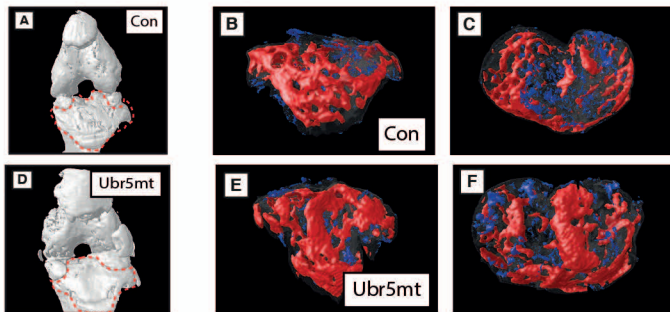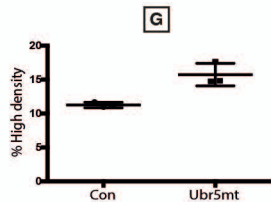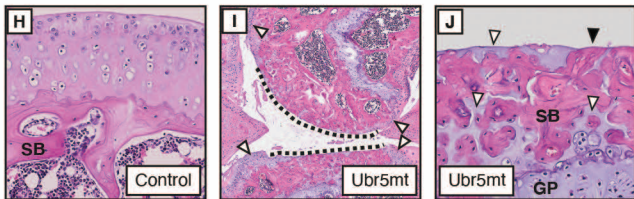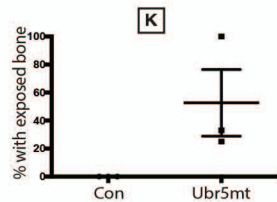

Fig. 4

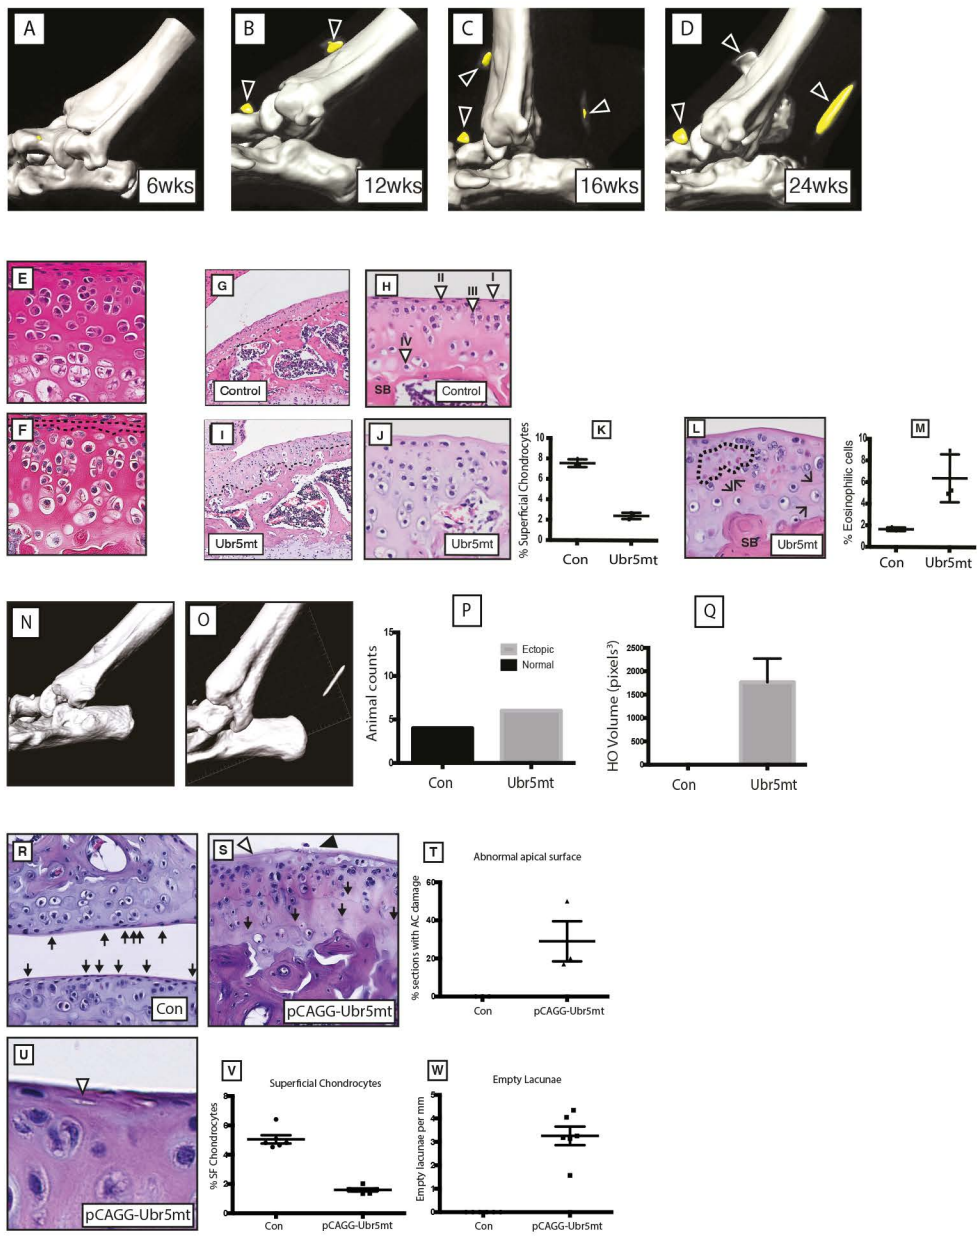

Fig. 5

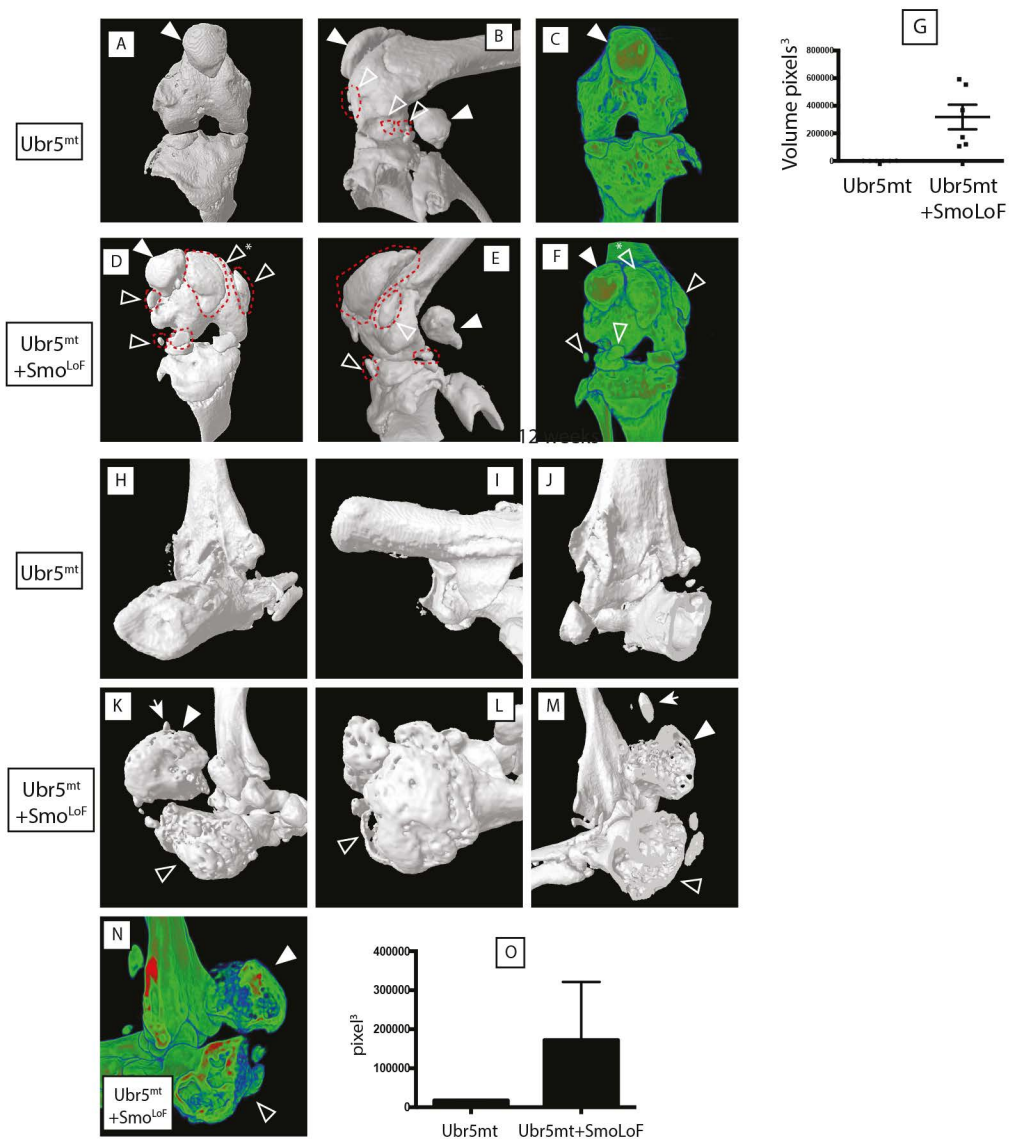

Fig. 6

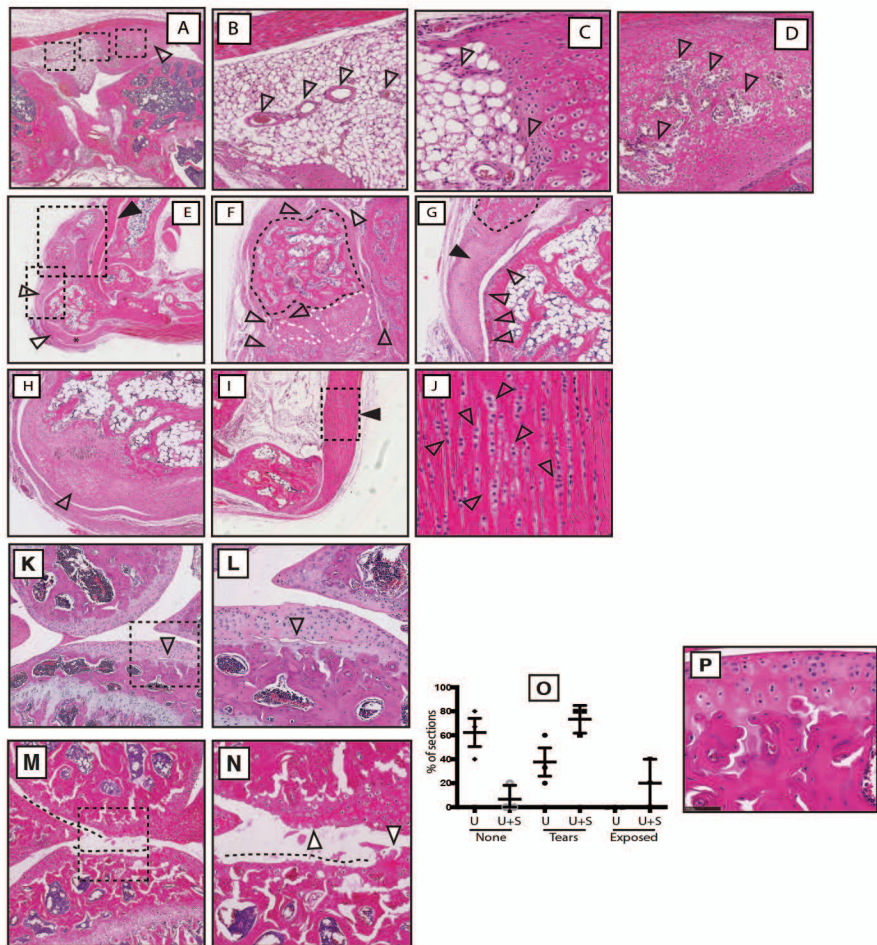

Fig. 7

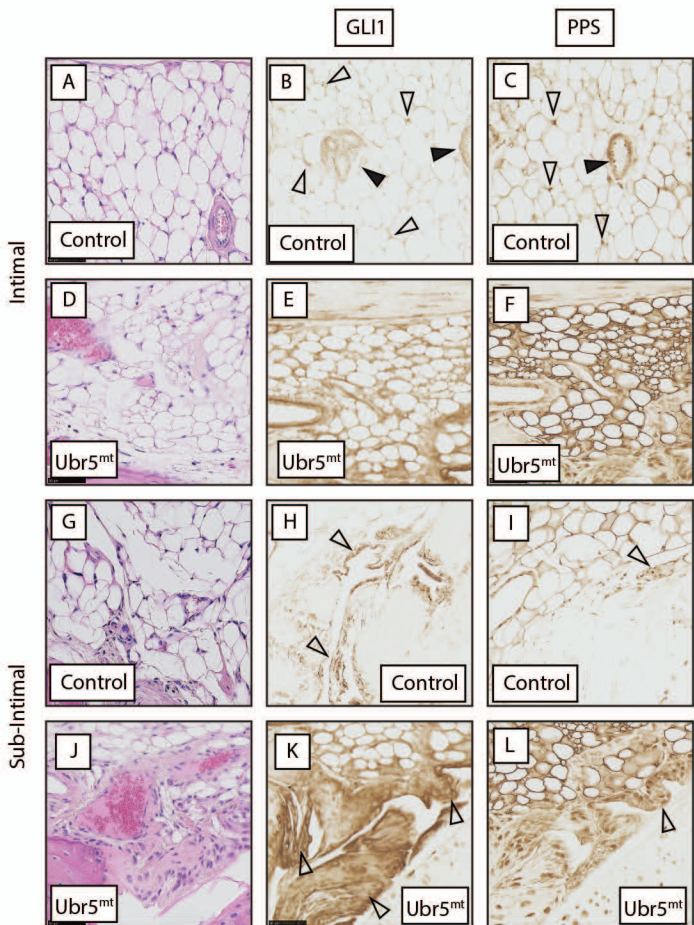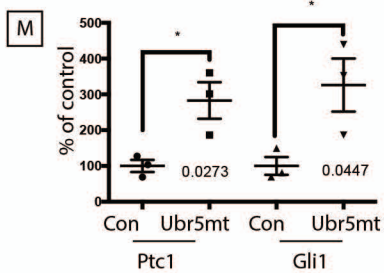

Fig. 8

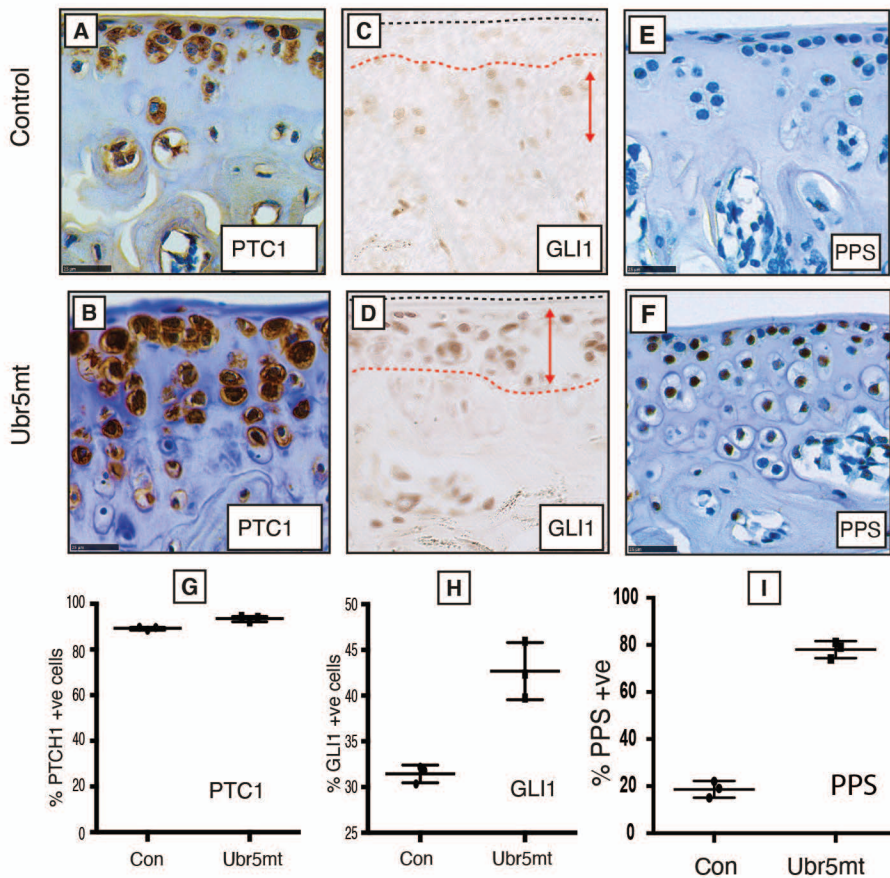

Fig.9

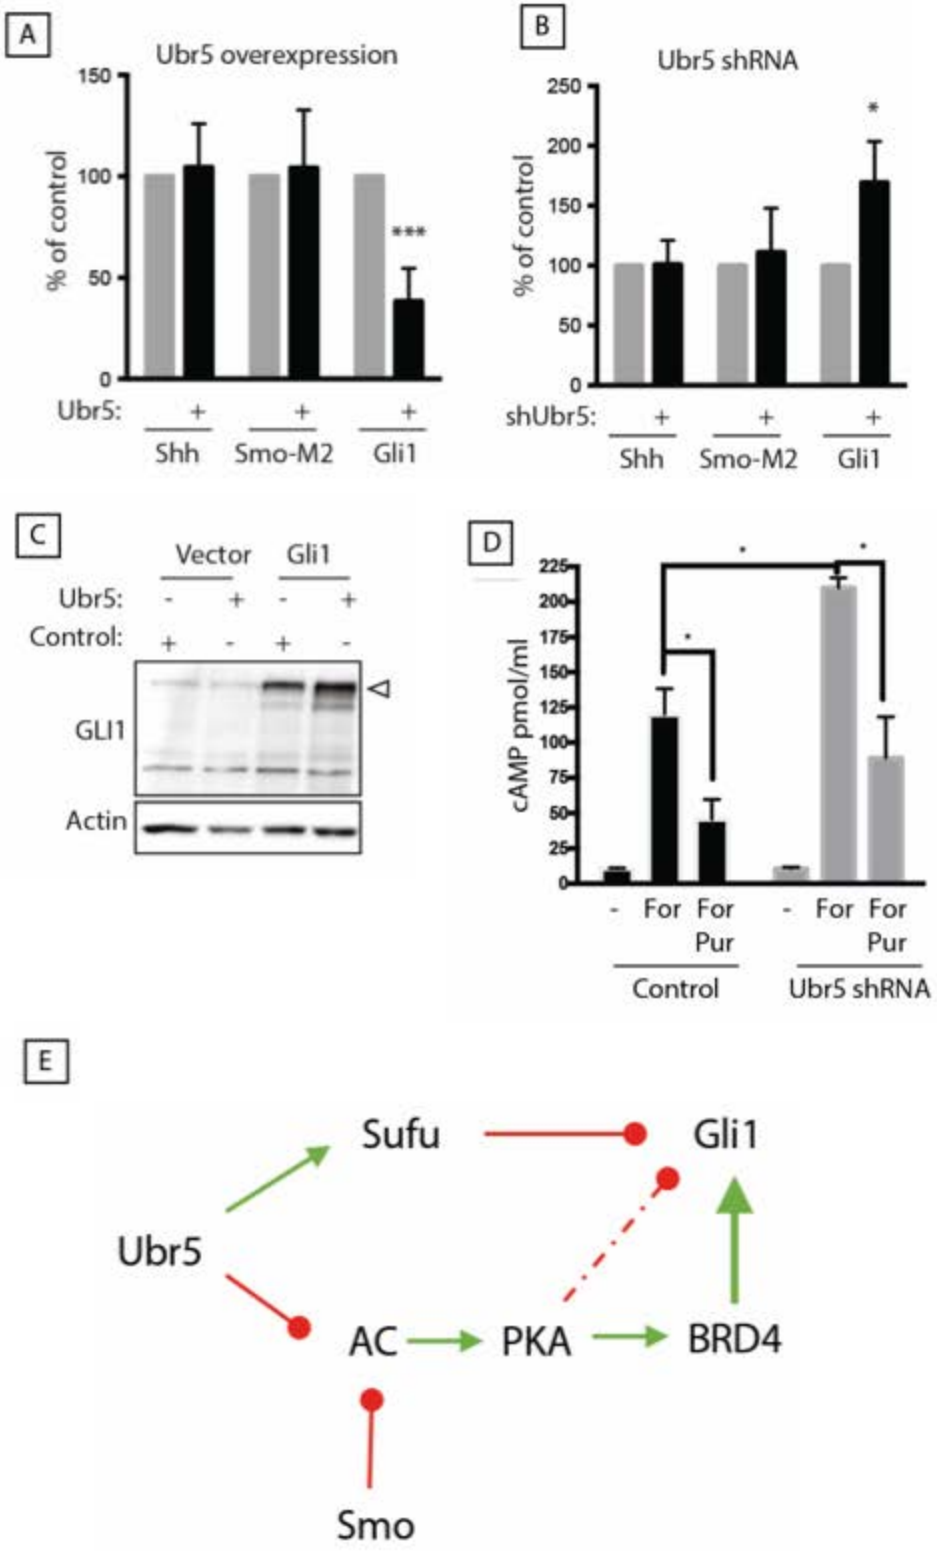

## Supplementary Information

### Supplementary Figure 1. *Ubr5<sup>mt</sup>* mice exhibit gait abnormalities and ectopic X-ray-dense signals.

24-week-old control or *Ubr5<sup>mt</sup>* mice were assessed for (A-C) behavioral analysis. (A,B) Mice were videoed while walking along a boxed runway and their static positioning recorded as either 'sprung' (with their posterior not in contact with the floor), or 'squat' (with their posterior resting on the floor). (C) Graph showing counts of animal behavior. n = six and eight male and females for control and *Ubr5<sup>mt</sup>* genotypes, respectively. Fisher's exact test, p value = <0.0001. (D) Control ankles and (E) *Ubr5<sup>mt</sup>* ankles which exhibited ventrally- and dorsally located isolated signals. (F) Dashed box region enlarged. (G) Control knee joints exhibited the fabella, a dorsally-located sesamoid bone (closed arrowhead). (H) *Ubr5<sup>mt</sup>* knee joints exhibited a misshapen fabella (closed arrowhead), with the dashed boxed region being enlarged (I). n = eight males and eight females.

### Supplementary Figure 2. Ectopic structures are not detected in three-week-old control or *Ubr5<sup>mt</sup>* ankle or knee joints and require postnatal expression of *Ubr5*.

(A-D) Different views of surface rendered 3D models of three-week-old control and *Ubr5<sup>mt</sup>* (A,B, respectively) knee and (C,D, respectively) ankle joints. (A-D) From left to right panels: ventral, dorsal, medial and lateral views. Both control and *Ubr5<sup>mt</sup>* joints exhibit either a normal array of sesamoid bones, developing epiphysis and calcifying menisci. (E-G) Analysis of 18-week-old tamoxifen-treated *pCAGG-Cre* control and *pCAGG-Ubr5<sup>mt</sup>* ankle joints. (E,F) Whole mount  $\beta$ -Gal staining of (E) control and (F) *pCAGG-Ubr5<sup>mt</sup>* ankle joints reveals  $\beta$ -gal expression in muscles and associate tendons. Sagittal section of ankle joint (G) showing an ectopic structure associated with the AT midbody (closed arrowhead) stained positive for *Ubr5/UBR5* expression

### Supplementary Figure 3. UBR5 and PPS levels correlate with human AC damage.



(A-C) Examples of human OA patient material stained with (A) haematoxylin and eosin (H&E), (B) toluidine blue or (C) safranin O revealed intra- and inter-sample variation in AC defects. Coloured boxes indicate regions of the varying OA severity (please see figure key). (A-C) Colour-coded, magnified dashed boxes in upper panels are shown in more detail in the colour-coded lower panels (thick outlines). Moderate-scored regions (orange) exhibited extensive surface fibrillation and reduced toluidine blue and safranin O staining in comparison to low-scored regions (green). Severe-scored regions (red) exhibited loss of safranin O staining and apical-basal clefts in the AC surface. (C) The dashed black lines indicate the apical edge of the AC. (D-K) Human AC samples graded as low, mild or moderately damaged were analysed for (D,F,H) PKA activity (PPS) and (E,G,I) UBR5 expression. Graphs of percentage of (J) PPS and (K) UBR5 positive cells for low and combined values for mild and moderate AC grades. Mean and s.e.m indicated. n = six biological replicates. Fishers exact test on pooled cell count data.  $p = <0.0001$  for both.

#### **Supplementary Figure 4. Spectrum of *Ubr5<sup>mt</sup>* and *Ubr5<sup>mt</sup>+Smo<sup>LoF</sup>* associated tissue-specific metaplastic responses.**

Overview of the metaplastic events of various *Ubr5<sup>mt</sup>* tissues. Red = non-cartilaginous tissues (Synovium, AT and Superficial Digital Flexor tendon); Orange = cartilaginous tissues (retinaculum); Yellow = calcified cartilage; Green = normotopic bone; Blue = heterotopic or enlarged normotopic bone. Arrows indicate the direction of metaplasia, with the arrowhead indicating the tissue type in 24-week-old *Ubr5<sup>mt</sup>* and/or *Ubr5<sup>mt</sup>+Smo<sup>LoF</sup>* animals. Metaplastic tissue events unique to *Ubr5<sup>mt</sup>+Smo<sup>LoF</sup>* are indicated by an asterisk.

# Supplementary Figure 1

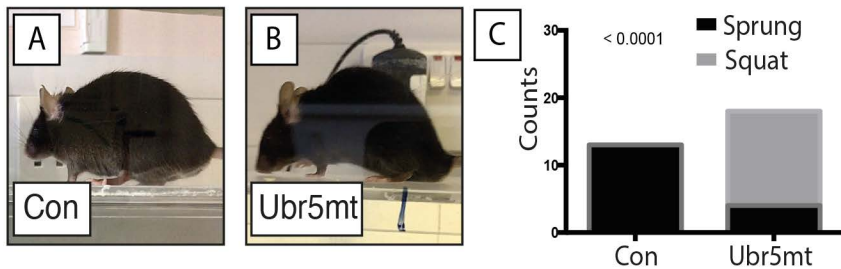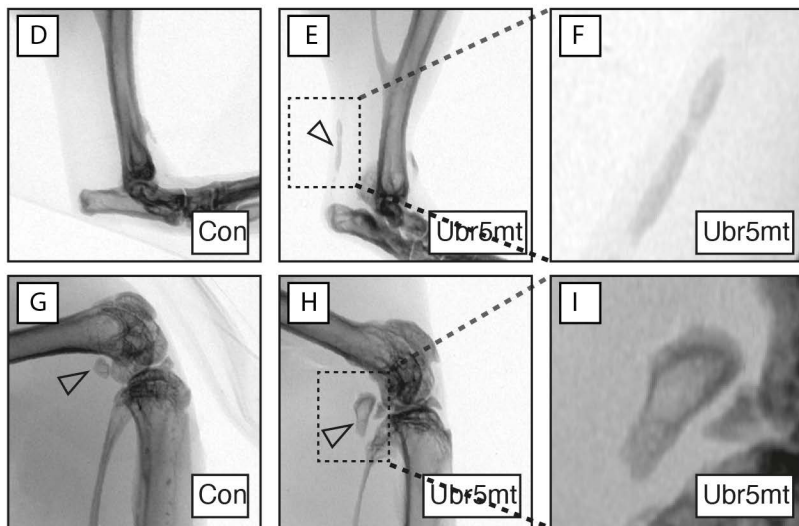

## Supplementary Figure 2

three weeks knee

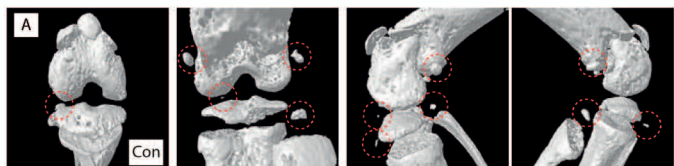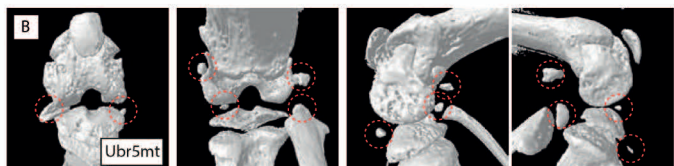

three weeks ankle

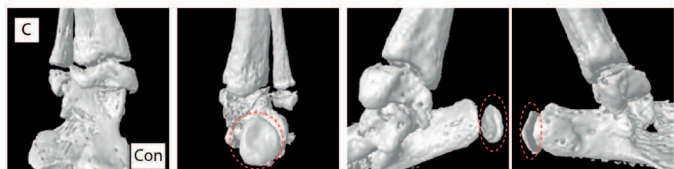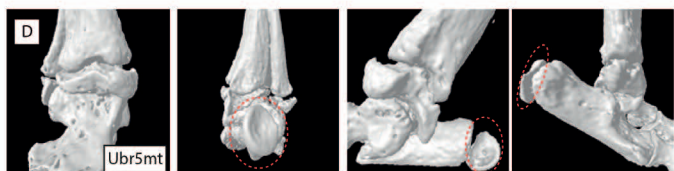

LacZ expression after tamoxifen treatment

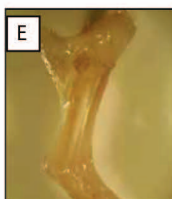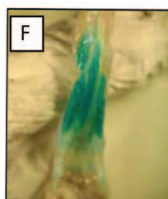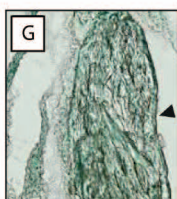

# Supplementary Figure 3

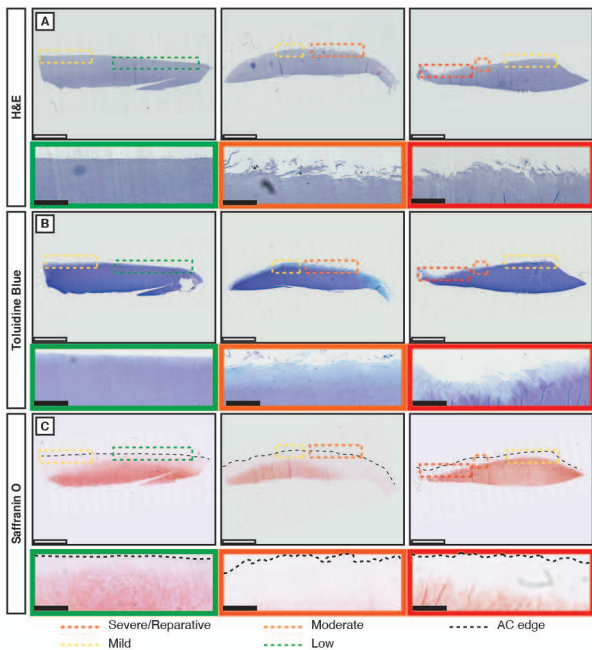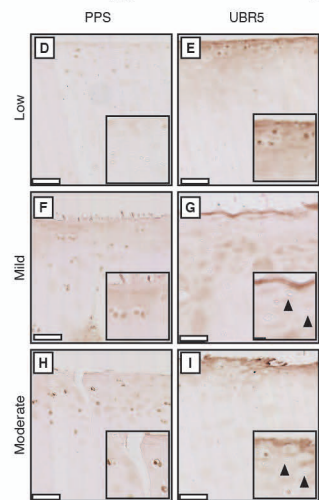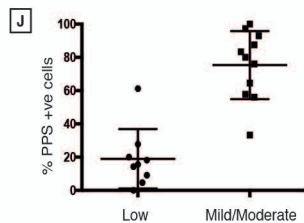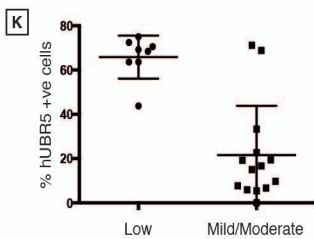

Supplementary Figure 4

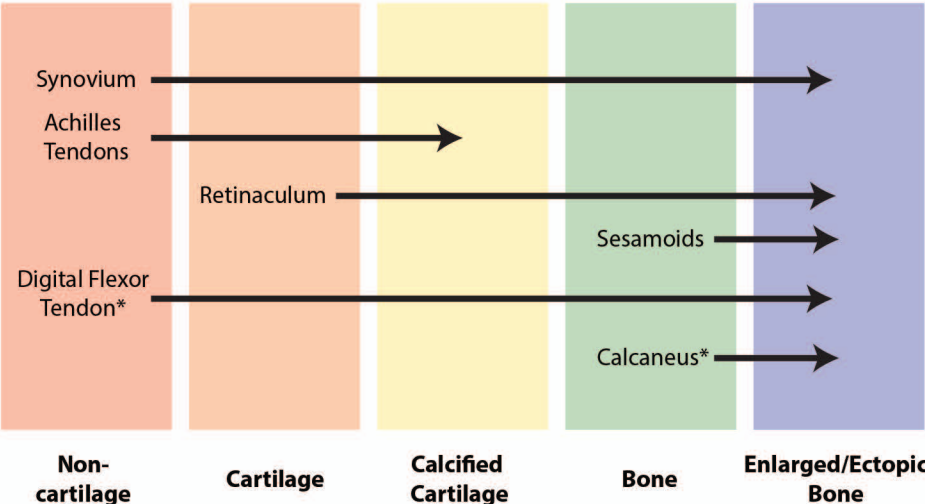

Source: https://www.biorxiv.org/content/10.1101/2020.12.04.411405v1.full.pdf
